# Supplementary material for: Effects of menaquinone-7 supplementation in patients with aortic valve calcification: study protocol for a randomised controlled trial
Source: PubMed Central journal article supplement — BMJ Open. 2018 Aug 23;8(8):e022019. doi: 10.1136/bmjopen-2018-022019 (PMC6112404; doi:10.1136/bmjopen-2018-022019), 2018-08-23
Supplement: bmjopen-2018-022019.draft_revisions.pdf [file bmjopen-2018-022019.draft_revisions.pdf]

# BMJ Open

BMJ Open is committed to open peer review. As part of this commitment we make the peer review history of every article we publish publicly available.

When an article is published we post the peer reviewers' comments and the authors' responses online. We also post the versions of the paper that were used during peer review. These are the versions that the peer review comments apply to.

The versions of the paper that follow are the versions that were submitted during the peer review process. They are not the versions of record or the final published versions. They should not be cited or distributed as the published version of this manuscript.

BMJ Open is an open access journal and the full, final, typeset and author-corrected version of record of the manuscript is available on our site with no access controls, subscription charges or pay-per-view fees (<http://bmjopen.bmj.com>).

If you have any questions on BMJ Open's open peer review process please email [info.bmjopen@bmj.com](mailto:info.bmjopen@bmj.com)

# BMJ Open

## The effects of Menaquinone-7 supplementation in patients with aortic valves calcification: study protocol for a randomized controlled trial

|                               |                                                                                                                                                                                                                                                                                                                                                                                                                                                                                                                                                                                                                                                                                                                                                                                                                                                                                                                                                                                                                                                                                                                                                                                                                                                                                                                           |
|-------------------------------|---------------------------------------------------------------------------------------------------------------------------------------------------------------------------------------------------------------------------------------------------------------------------------------------------------------------------------------------------------------------------------------------------------------------------------------------------------------------------------------------------------------------------------------------------------------------------------------------------------------------------------------------------------------------------------------------------------------------------------------------------------------------------------------------------------------------------------------------------------------------------------------------------------------------------------------------------------------------------------------------------------------------------------------------------------------------------------------------------------------------------------------------------------------------------------------------------------------------------------------------------------------------------------------------------------------------------|
| Journal:                      | <i>BMJ Open</i>                                                                                                                                                                                                                                                                                                                                                                                                                                                                                                                                                                                                                                                                                                                                                                                                                                                                                                                                                                                                                                                                                                                                                                                                                                                                                                           |
| Manuscript ID                 | bmjopen-2018-022019                                                                                                                                                                                                                                                                                                                                                                                                                                                                                                                                                                                                                                                                                                                                                                                                                                                                                                                                                                                                                                                                                                                                                                                                                                                                                                       |
| Article Type:                 | Protocol                                                                                                                                                                                                                                                                                                                                                                                                                                                                                                                                                                                                                                                                                                                                                                                                                                                                                                                                                                                                                                                                                                                                                                                                                                                                                                                  |
| Date Submitted by the Author: | 30-Jan-2018                                                                                                                                                                                                                                                                                                                                                                                                                                                                                                                                                                                                                                                                                                                                                                                                                                                                                                                                                                                                                                                                                                                                                                                                                                                                                                               |
| Complete List of Authors:     | Lindholt, Jes; Odense Universitetshospital, Department of Cardiothoracic and Vascular Surgery; Odense Universitetshospital, Centre for Individualized Medicine in Arterial Diseases<br>Frandsen, Niels Erik<br>Fredgart, Maise; Odense Universitetshospital, Department of Cardiology<br>Dahl, Jordi; Odense Universitetshospital, Department of Cardiology<br>Møller, Jacob; Odense Universitetshospital, Department of Cardiology<br>Folkestad, Lars; Odense Universitetshospital, Department of Endocrinology<br>Urbonaviciene, Grazina; Regionshospitalet Silkeborg<br>Becker, Søren; Regionshospitalet Silkeborg<br>Lambrechtsen, Jess; Svendborg Sygehus, Department of Cardiology<br>Egstrup, Kenneth; Svendborg Sygehus, Department of Cardiology<br>Hald, Flemming; Vejle Hospital, Department of cardiology<br>Busk, Martin; Sygehus Lillebalt Vejle Sygehus, Department of Cardiology<br>Rasmussen, Lars; Odense Universitetshospital, Department of Clinical Biochemistry and Pharmacology; Odense Universitetshospital, Centre for Individualized Medicine in Arterial Diseases<br>Mickley, Hans; Odense Universitetshospital, Cardiology<br>Diederichsen, Axel; Odense Universitetshospital, Department of Cardiology; Odense Universitetshospital, Centre for Individualized Medicine in Arterial Diseases |
| Keywords:                     | menaquinone-7, aortic valve calcification, Valvular heart disease < CARDIOLOGY, Calcium & bone < DIABETES & ENDOCRINOLOGY, Cardiovascular imaging < RADIOLOGY & IMAGING, randomized clinical trial                                                                                                                                                                                                                                                                                                                                                                                                                                                                                                                                                                                                                                                                                                                                                                                                                                                                                                                                                                                                                                                                                                                        |
|                               |                                                                                                                                                                                                                                                                                                                                                                                                                                                                                                                                                                                                                                                                                                                                                                                                                                                                                                                                                                                                                                                                                                                                                                                                                                                                                                                           |

SCHOLARONE™  
Manuscripts

# The effects of Menaquinone-7 supplementation in patients with aortic valves calcification: study protocol for a randomized controlled trial

## Acronym: The Aortic Valve DECalcification (AVADEC) trial

Authors: Jes Lindholt,<sup>1,2</sup> Niels Erik Frandsen,<sup>3</sup> Maise Høigaard Fredgart,<sup>4</sup> Jordi Sanchez Dahl,<sup>4</sup> Jacob Møller,<sup>4</sup> Lars Folkestad,<sup>5</sup> Grazina Urbonaviciene,<sup>6</sup> Søren Warberg Becker,<sup>6</sup> Jess Lambrechtsen,<sup>7</sup> Kenneth Egstrup,<sup>7</sup> Flemming Hald,<sup>8</sup> Martin Busk,<sup>8</sup> Lars Melholt Rasmussen,<sup>2,9</sup> Hans Mickley<sup>4</sup> and Axel Diederichsen<sup>2,4</sup>

<sup>1</sup> Department of Cardiothoracic and Vascular Surgery, Odense University Hospital, DENMARK

<sup>2</sup> Centre for Individualized Medicine in Arterial Diseases, DENMARK

<sup>3</sup> Kirkestenten 16, Skt Klemens, 5260 Odense S

<sup>4</sup> Department of Cardiology, Odense University Hospital, DENMARK

<sup>5</sup> Department of Endocrinology, Odense University Hospital, DENMARK

<sup>6</sup> Department of Cardiology, Silkeborg Hospital, DENMARK

<sup>7</sup> Department of Cardiology, Svendborg Hospital, DENMARK

<sup>8</sup> Department of Cardiology, Vejle Hospital, DENMARK

<sup>9</sup> Department of Department of Clinical Biochemistry and Pharmacology, Odense University Hospital, DENMARK

Corresponding author:

Axel Cosmus Pyndt Diederichsen

Department of Cardiology, Odense University Hospital, DENMARK

Postal address: J. B. Winsløvs Vej 4, 5000 Odense, DENMARK

Telephone number: +45 40191227

Mail: [axel.diederichsen@rsyd.dk](mailto:axel.diederichsen@rsyd.dk)

Word count (main text): 3559

Key words: menaquinone-7, aortic valve calcification, double-blind, randomized, placebo-controlled study

## 1. Abstract

### Introduction

Aortic stenosis is a common heart valve disease and due to the growing elderly population the prevalence is increasing. The disease is progressive with increasing calcification of the valve cusps. A few attempts with medical preventive treatment have failed, thus presently the only effective treatment of aortic stenosis is surgery. This study will examine the effect of menaquinone-7 (MK-7) supplementation on progression of aortic valve calcification (AVC). We hypothesize that MK-7 supplementation will slow down the calcification process.

### Method and analysis

In this multicenter and double-blinded placebo-controlled study, 400 men aged 65-74 years with severe AVC are randomized (1:1) to treatment with MK-7 (720 µg/day) supplemented by the recommended daily dose of vitamin D (25 µg/day) or placebo treatment (no active treatment) for two years. Exclusion criteria are treatment with vitamin K antagonist or coagulation disorders. To evaluate AVC score, a non-contrast CT-scan is performed at baseline and repeated after 12 and 24 months of follow-up. Primary outcome is difference in AVC score from baseline to follow-up at two years. Intention-to-treat principle is used for all analyses.

### Ethics and dissemination

There are no reported adverse effects associated with the use of MK-7. The protocol is approved by the Regional Scientific Ethical Committee for Southern Denmark (S-20170059) and the Data Protection Agency (17/19010). It is conducted in accordance with the Declaration of Helsinki. Positive as well as negative findings will be reported.

### Trial registration number

ClinicalTrials.gov Identifier: NCT03243890.

### Strengths and limitations of this study

- The study is the first to investigate the effect of menaquinone-7 supplementation on progression of aortic valve calcification.
- Strengths include the stratified randomization, double-blind placebo-controlled design and being a multi-centre trial.
- A clinical relevant dose of Menaquinone-7 supplementation is unknown, and accordingly the chosen dose might be insufficient.
- A confirmatory trial with clinical outcomes is needed, if progression of aortic valve calcification is decreased by menaquinone-7 supplementation.

For peer review only

## 2. Introduction

In the ongoing Danish Cardiovascular Screening (DANCAVAS) trial, we are randomizing (1:2) 45,000 Danish men aged 65-74 years to a screening examination comprising a non-contrast CT scan.<sup>1</sup> The purpose is to investigate whether an advanced cardiovascular screening will prevent death and cardiovascular events. In a supplementary PhD study, we have been studying aortic valve calcification (AVC). With prevalence ranging from 2 to 7%, aortic valve stenosis is the most common heart valve disease in the western world,<sup>2;3</sup> and combined with the rapidly growing elderly population it is likely that the prevalence will increase further in the future. Central in the pathogenesis is pro-osteogenic factors entailing active bone formation in the valve cusps and this drive disease progression.<sup>4;5</sup> To halt aortic stenosis progression preventive medical treatments with statins and bisphosphonates have been explored in randomized clinical trials, but with discouraging results. Thus at present medical treatment is not an option.<sup>6</sup>

In DANCAVAS, we have made an interesting observation. Patients on vitamin K antagonist (VKA) treatment had a significant increased AVC score (median 32 versus 11,  $p=0.004$ ). Adjusting for age, smoking, hypertension and cardiovascular disease, this was confirmed in binominal negative (IRR 1.70, 95%CI: 1.25-2.31) and logistic regression (OR 1.66, 95%CI 1.19-2.30) (unpublished results). Thus, in DANCAVAS, patients on VKA seem to have increased aortic valve calcifications.

### Vitamin K and the calcification process

Calcification is a slowly progressive process and caused by an imbalance between the mechanisms that promotes and inhibits the deposition of calcium in the vascular wall, and the vitamin K-dependent proteins play an essential role in this inhibition. The most familiar of the K vitamins are phyloquinone (VK1), as this is essential in activation of several coagulation factors, but menaquinone (MK) is another very important vitamin K species. MK is deemed necessary for  $\gamma$ -carboxylation of proteins involved inhibition of arterial calcification, i.e. matrix-Gla proteins (MGP).<sup>7-10</sup> Without these activated proteins, the balance of cellular calcium uptake and the mineralization process in bone and blood vessels is impaired. Additionally, clinical studies suggest that MK preserves bone structure.<sup>11</sup>

The inhibiting process of the vitamin K-dependent proteins was originally showed by Luo et al. in 1997.<sup>12</sup> In a mice model they described MGP to be an important inhibitor of calcification of arteries. In other animal studies, the inhibition of the vitamin K-dependent proteins by VKA resulted in arterial and soft tissue calcification.<sup>13-16</sup> These observations are in agreement with our findings from the DANCAVAS trial, and other human studies have also shown that long-term use of VKA is associated with both increased coronary- and extra-coronary vascular calcification.<sup>17-20</sup> Furthermore, in Japanese, the use of VKA was associated to exacerbate the risk of degenerative aortic valve disease.<sup>21</sup> Finally, low circulating MGP and an impaired carboxylation at its tissue site of expression is associated with the development and progression of cardiovascular disease.<sup>22</sup>

Since VKA seems to induce vascular calcification, MK intake may be beneficial to reduce these calcifications. No recommendations of MK are available, however we know that the daily intake in the Western world is not sufficient to meet the request for a complete activation of MGP.

1  
2  
3  
4 Observational studies in healthy elderly have shown an inverse relationship between MK-4 intake  
5 and coronary artery calcification (CAC),<sup>23</sup> and VK1 did slow the progression of CAC after 3 years  
6 of follow-up.<sup>24</sup> Furthermore, VK1 and MK-7 decreased arterial stiffness and improved elastic  
7 properties of the carotid artery.<sup>25;26</sup> Dalmeijer et al. performed a randomized, double blind, placebo  
8 controlled trial to investigate the effect of MK-7 supplementation (180 µg/day, 360 µg/day or  
9 placebo) and found a dose-dependent decrease of uncarboxylated MGP concentrations.<sup>27</sup> Two  
10 subsequent studies in haemodialysis patients found an almost linear dose-response decrease of  
11 uncarboxylated MGP without an upper limit, with doses ranging between 360 µg/day and 1080 µg  
12 trice weekly.<sup>28;29</sup> In a supplementary study, MK-7 was well tolerated and did not cause a  
13 hypercoagulable state.<sup>30</sup> Finally, there is no documented toxicity for VK1 or MK-4, and MK-7, and  
14 the WHO has set no upper tolerance level for vitamin K intake.<sup>31</sup>

## 18 2.1. Hypothesis

19 In a randomized setup we test the hypothesis that supplementation with MK-7 (720 µg per day) and  
20 vitamin D (25 µg/day) in comparison to placebo will half the progression of further aortic valve  
21 calcification in patients with severe valve calcification, but without aortic valve stenosis.  
22  
23

## 25 3. Methods

### 27 3.1. Trial design

28 The study is a double-blind, randomized, placebo-controlled study.  
29  
30

### 31 3.2. Participants

32 In DANCAVAS we are performing echocardiography in all participants with an AVC score above  
33 the 90% percentile (AVC score above 300).<sup>32</sup> Patients with an AVC score above 300, but without  
34 aortic valve stenosis are eligible patients in AVADEC.  
35  
36

37 Exclusion criteria are:

- 38 • Prior heart valve surgery
  - 39 • Known significant aortic valve disease (peak velocity  $\geq 3.0$  m/s)
  - 40 • History of venous thrombosis including pulmonary embolism
  - 41 • Coagulation disorders
  - 42 • VKA use
  - 43 • Disorders of calcium and phosphate metabolism
  - 44 • A life-expectancy < 5 years
- 45  
46  
47

48 The study takes place at Odense University Hospital, and the hospitals in Svendborg, Vejle and  
49 Silkeborg, Denmark, from 2018 to 2020.  
50

### 51 3.3. Intervention

52 In AVADEC, half of the patients are randomized to supplementation with MK-7 (720 µg/day)  
53 including the recommended daily dose of vitamin D (25 µg/day) and the other half to placebo  
54 treatment (no active treatment). Treatment of both groups will last for at least 24 months. During  
55  
56  
57  
58

1  
2  
3  
4 this time participants will visit our research unit five times, at 6-month intervals (Figure 1). To  
5 evaluate AVC score, we will perform a non-contrast CT-scan at baseline and after 12 and 24  
6 months of follow-up.  
7

### 8 **3.4. Outcome**

9  
10 The *primary endpoint* is the change in AVC score from baseline to two years. The natural history of  
11 the aortic valve calcification is not adequately understood, and accordingly the changes are  
12 analyzed in two prespecified patient subgroups (AVC score 300-599 and  $\geq 600$ , respectively).  
13

14 *Secondary endpoints* are:

- 15 • Change in calcifications in the coronaries, carotid, aortic, renal, iliac and femoral arteries by  
16 non-contrast CT.
- 17 • Change in coronary and carotid plaque composition by contrast CT
- 18 • Change in aortic valve area by transthoracic echocardiography.
- 19 • Change in bone density as quantitative CT of the columna lumbalis and hip region.
- 20 • Change in MGP and osteocalcin with different phosphorylation (p and dp) and carboxylation  
21 forms (c and uc).
- 22 • Quality of life.
- 23
- 24
- 25

26 *Safety endpoints* are:

- 27 • Death
- 28 • Cardiovascular events (myocardial infarction, coronary revascularization, stroke, heart valve  
29 surgery, significant aortic disease (including dissection, ruptur and surgery) and significant  
30 peripheral artery disease (including thromboembolisms and surgery))
- 31 • Progressive aortic valve disease (more than 50% increase in AVC score)
- 32 • Venous thromboembolism including pulmonary embolism
- 33 • Bleeding (including intracranial bleeding and hemorrhage associated with a drop in hemoglobin  
34 of  $\geq 2$ mmol/l)
- 35 • Low-energy or spontaneous fracture
- 36 • Cancer, including solid and hematologic
- 37 • Significant deterioration in laboratory measurements (calcium, magnesium, albumin, phosphate,  
38 alkaline phosphatase, bone specific alkaline phosphatase, Parathyroid Hormone, vitamin D or  
39 Prothrombin time-International normalized ratio (PT-INR)).
- 40
- 41
- 42
- 43
- 44

### 45 **3.5 Sample size**

46 We are planning a study of a continuous response variable from independent control and  
47 experimental subjects with 1 control per experimental subject. The mean annual AVC progression  
48 is unknown, but based on data from the DANCAVAS study we estimate the progression to be 32  
49 units in two years. Likewise we estimate the standard deviation to be 59 units. We expect that the  
50 treatment will reduce the AVC progression by half, and if this is true (a AVC progression at 16 and  
51 32 among experimental and control subjects, respectively), we will need to study 200 experimental  
52 subjects and 200 control subjects to be able to reject the null hypothesis that the population means  
53  
54  
55  
56  
57  
58



of the experimental and control groups are equal with probability (power) 0.8. The Type I error probability associated with this test of this null hypothesis is 0.05.

The sample size is based on two years of treatment, but the Steering Committee may decide to continue the study beyond the planned trial end, if they believe the primary end point may be reached after one additional year of treatment.

### 3.6 Stratified randomization

Subjects will be randomized 1:1 after stratification for site (Odense University Hospital, Svendborg Hospital, Vejle Hospital or Silkeborg Hospital), and AVC score (300-599 or  $\geq 600$ ). Each site will be provided with sequentially numbered, opaque and sealed envelopes containing randomly generated treatment allocations. Two types of envelopes are provided; 1) AVC 300-599; and 2) AVC  $\geq 600$ .

### 3.7 Blinding

The randomization-list is available to the data and safety monitoring board, but patients, nurses, physicians and other data collectors are kept blinded to the allocation during the study. The placebo is matched to the study drug for taste, color, and size.

### 3.8 Statistical methods

We will use the intention-to-treat principle for all analyses. The primary endpoint (change in AVC score) will be presented as continuous variables. Additional, the changes are analyzed in two pre-specified patient subgroups (AVC score 300-599 and  $\geq 600$ , respectively). Secondary endpoints include 1) change in calcifications in the coronaries, carotid, aortic, renal, iliac and femoral arteries; 2) change in coronary and carotid plaque composition by contrast CT; 3) change in aortic valve area by transthoracic echocardiography and 4) change in bone-density, -geometry and -microstructure as quantitative CT of the columna lumbalis and hip region. We use an analysis of covariance (ANCOVA) for the primary and for secondary endpoints as well as potential harms and this is supplemented by a repeated measures analysis.

## 4. Organization

The study is a part of the DANCAVAS trial, and conducted in collaboration with Centre for Individualized Medicine in Arterial Diseases (CIMA). The DANCAVAS secretariat at OUH will identify eligible patients in the DANCAVAS database, and an invitation is send by mail to these patients. If a patient is interested, he is invited to the local site to discuss the trial with a study nurse. If he is willing to participate in the study, informed consent is obtained, and he is randomly assigned to the MK-7 or placebo group. Nurses, radiographers. biomedical technicians and a PhD student are responsible for the treatment and examinations. During the study, only the independent data and safety monitoring board will have access to the complete database including the randomization-list. The data registration is performed via REDCap (Research Electronic Data Capture) with logging and secure storage directly on a server under Odense Patient data Explorative Network (OPEN), Region of Southern Denmark.

1  
2  
3  
4 *The Executive Committee*, consisting Professor Jes Lindholt (JL, Department of Cardiothoracic and  
5 Vascular Surgery, OUH), MD Niels Erik Frandsen (NEF) and associate professor Axel  
6 Diederichsen (AD, Department of Cardiology, OUH) conceived and designed the study, and will  
7 handle the decisions regarding the overall organization including administration, budget and use of  
8 the database.  
9

10 *The Steering Committee* will consist of the members of the executive committee, and Jordi Dahl  
11 (JD, Department of Cardiology, OUH), Professor Lars Melholt Rasmussen (LMR, Department of  
12 Clinical Biochemistry and Pharmacology) both OUH, and two from each screening site. All  
13 practical issues concerning the treatment and data sampling will be handled by the steering  
14 committee.  
15

16 *The data and safety monitoring board (DSMB)* consists of the following experts: Professor of  
17 Cardiology Hans Mickley (HM, OUH), Professor of Cardiology and Clinical Epidemiology  
18 Christian Torp-Pedersen (Aalborg University) and Professor of Cardiology Lars Køber  
19 (Rigshospitalet), who all have large have experience with clinical randomized trials.  
20  
21  
22

## 23 **5. Publication**

24 Project results reporting the primary endpoint will be published in peer reviewed international  
25 journals. The order of the authors will be PhD student (to be appointed), JL, JD, LF, two from each  
26 screening site, LMR, NEF and AD. Positive as well as negative findings will be reported.  
27  
28  
29

## 30 **6. Feasibility**

31 By December 2017 more than 10000 participants have been included in DANCAVAS, and 800 of  
32 these are eligible to participate in AVADEC. Thus we are able to identify enough participants. AD  
33 and JL are PI's of the main study, DANCAVAS. In addition, several experts assist with AVADEC:  
34 JD is an expert in aortic stenosis, LMR is an expert in biochemistry, while PhD Lars Folkestad (LF)  
35 has undertaken several studies in bone-density, -geometry and -microstructure. In addition, local  
36 cardiologist from Vejle, Svendborg and Silkeborg will be responsible for securing local practical  
37 feasibility of the project at the specific screening sites.  
38  
39  
40  
41

## 42 **7. Safety and Ethics**

43 Pure natural MK-7 is used in the study. A daily dose at 720 µg MK-7 has not been examined on  
44 patients with aortic stenosis, but in a Belgian dose-finding study using 360, 720 or 1080 µg of MK-  
45 7 thrice weekly for 8 weeks in chronic haemodialysis patients no severe adverse effects were  
46 observed.<sup>29</sup> Presently the Belgian group are performing a randomized trial exploring the efficacy of  
47 2000 µg MK-7 thrice weekly.<sup>33</sup> MK-7 is well tolerated and does not cause a hypercoagulable  
48 state.<sup>30</sup> There are no reported adverse effects associated with the use of MK-7.<sup>31</sup>  
49  
50  
51

52 Each patient has three CT scans during the study. Epidemiological studies do suggest that radiation  
53 exposure is associated with a slightly increased risk of cancer. The best studied cohort is the  
54 Japanese atomic bomb survivor cohort. In a group exposed to a mean radiation dose of 29 mSv, an  
55  
56  
57  
58

1  
2  
3  
4 excess of solid cancers – corresponding to an excess relative risk of 2% – were observed.<sup>34</sup> No large  
5 studies involving medically exposed adult cohorts are available, but a linear no-threshold model has  
6 been considered. Thus, there may be no minimal radiation dose for an increased cancer risk, and the  
7 risk increases linearly with the radiation dose. The average dose of one non-contrast CT scan is 3  
8 mSv. Two additionally contrast CT scans are performed (baseline and 24 months) with an average  
9 dose of 3 mSv each, thus at average the participants in AVADEC will receive 15 mSv. For  
10 comparison, the annual background radiation dose in Denmark is 3 mSv, and the average annual  
11 limit for radiation workers is 20 mSv.<sup>35</sup>  
12  
13

14 An independent DSMB is established to perform ongoing safety surveillance. None of the DSMB-  
15 members are directly or indirectly involved in the coordination, execution or analysis of the study.  
16 The following is assessed: 1) death, myocardial infarction, coronary revascularization, stroke, heart  
17 valve surgery and venous thromboembolism, 2) progressive aortic valve disease, and 3) laboratory  
18 measurements (Calcium, Magnesium, Albumin, Phosphate and alkaline phosphatase, bone specific  
19 alkaline phosphatase, Parathyroid Hormone and vitamin D or Prothrombin time-International  
20 normalized ratio (PT-INR)). If there is a reason for concern, the DSMB can advise to interrupt  
21 the study for further analysis, and the study can be terminated prematurely if the number of severe  
22 adverse events is significantly higher in the treatment group versus the placebo group. This will be  
23 discussed in a meeting with the investigators and DSMB. The investigator will inform the subjects  
24 in case of interruption or termination of the study.  
25  
26  
27  
28

29 Subjects can leave the study at any time for any reason if they wish to do so, without any  
30 consequences. The investigator can decide to withdraw a subject from the study for urgent medical  
31 reasons or in case of demonstrable poor adherence to the study medication. This is assessed by  
32 interview and pill-count. If subjects are required to take VKA during the course of the study they  
33 will be withdrawn.  
34  
35

36 The protocol is approved by the Regional Scientific Ethical Committee for Southern Denmark (S-  
37 20170059) and the Data Protection Agency (17/19010). It is conducted in accordance with the  
38 Declaration of Helsinki. According to Danish legislation vitamin K is a dietary supplement, and  
39 accordingly license from the Danish Medicines Agency is not needed. Written informed consent is  
40 obtained from each participant. The study is registered at [clinicaltrials.gov](http://clinicaltrials.gov): NCT03243890.  
41  
42  
43

## 44 8. Discussion

45 Aortic stenosis is a common heart valve disease and due to the growing elderly population the  
46 prevalence is increasing. The disease is progressive with increasing calcification of the valve cusps.  
47 A few attempts with medical preventive treatment have failed, thus presently the only effective  
48 treatment of aortic stenosis is surgery. This study will examine the effect of MK-7 supplementation  
49 on progression of AVC in a randomized, placebo-controlled study. We hypothesize that MK-7  
50 supplementation will slow down the progression of valves calcification. If positive effects are  
51 shown a new treatment options may be available to prevent progression of aortic valve calcification.  
52 The result of this study will be expected at in 2021.  
53  
54  
55  
56  
57  
58

## 9. Applied tests during the study

### 9.1. Medical interview

At baseline, all relevant data are supplied from the DANCAVAS trial (e.g. AVC score, medical history and lifestyle factors).<sup>1</sup> At every visit, an interview is conducted and evaluating the following: incident cardiovascular disease, dyspnea, chest pain and quality of life (EurQoL 5D).

### 9.2. Laboratory Assessment

Blood samples are obtained at every visit. Routine parameters include:

- Circulating MGP species with different phosphorylation (p and dp) and carboxylation forms (c and uc) are measured using a sandwich enzyme-linked immunosorbent assay (ELISA) based on monoclonal antibodies.
- Creatinine (eGFR), Sodium, Potassium, Calcium, Magnesium, Albumin, Phosphate, alkaline phosphatase, bone specific alkaline phosphatase, Parathyroid Hormone, Vitamin D and INR.

As a part of the study, a biobank at baseline and after 24 months will be organized. 40 mL of blood from each of the participants are centrifuged, labeled, and stored at -80°C until serial testing.

### 9.3. Multi-Slice Computed Tomography Scans

CT scans will be performed using a high end CT- scanner like dual-source CT-scanner (Somatom Definition Flash, Siemens Medical Solutions, Forchheim, Germany). To assess the AVC scores the following CT settings are used: Gantry rotation time 0.28 s, 3.0 mm collimation, acquisition 128 x 0.6 mm, 120 kV tube voltage, 90 mAs tube current, and a prospectively electrocardiographic (ECG) -triggered scan (gating at 65%-75% of the R-R interval if the heart rate were <75 or at 250-400ms after the QRS-complex if heart rate were >75). Calculation of the AVC scores is performed off-line by summing-up all spots of calcifications in the aortic valve area. AVC is defined as calcification below the ostia of the coronaries in the aortic sinus Valsalva, within the valve leaflet, or in the aortic annulus.<sup>36</sup> The CAC score is assessed as previously described.<sup>32</sup> To assess the calcifications in the carotid, aortic, renal, iliac and femoral arteries a CT scanning proximal from the mandibular bone and distally to the proximal third of the femur are performed with the following settings: Spiral scan with a pitch of 3.2 (Flash), 100 kV tube voltage, 90 mAs, collimation of 128 x 0.6mm, Safire 3 and slice thickness 5 mm. The calcifications scores are measured using the Agatston method.

To examine vessel plaques in the coronaries and carotid arteries, an ordinary contrast CT will be performed. The scanning protocol depends on the local CT scanner. Typically 80–100 mL of contrast agent are injected into an antecubital vein at a rate of 6.0 mL/s followed by 60 mL intravenous saline (6.0 mL/s) using a dual-head power injector. A prospectively gated high pitch spiral “flash” protocol will be used in patients with a stable heart rate <60 beats per minute (bpm). In patients with a stable heart rate between 60 and 90 bpm, intravenously  $\beta$ -blocker is typically injected until the heart rate is appropriate, and a prospectively gated axial “adaptive sequence” protocol is used. In patients with a heart rate > 90 bpm or in case of an irregular heart rhythm, a retrospectively gated “helical” protocol with dose modulation will be used. Data acquisition parameters are 2\*128\*0.6 mm slice collimation, a gantry rotation time of 280 ms and a tube voltage of 100 or 120 kV depending on patients’ height and weight. The coronary artery tree will be

1  
2  
3  
4 analyzed for the presence and severity of CAD, according to the classification of the American  
5 Heart Association 16-segment model. Coronary plaques are defined as visible structures within or  
6 adjacent to the coronary artery lumen, which can be clearly distinguished from the vessel lumen and  
7 the surrounding pericardial tissue. Quantification of coronary plaque components is done via semi-  
8 automated analysis. Scans are analyzed an experienced cardiologist.  
9

#### 10 11 **9.4 Echocardiographic measurements**

12 A comprehensive transthoracic echocardiography is performed at baseline and hereafter annually.  
13 Left ventricle (LV) volume and ejection fraction (EF) are estimated. LV longitudinal function is  
14 assessed using global strain analysis. LV remodelling is assessed by relative wall thickness and LV  
15 mass using the Devereaux formula. LV filling pressure is estimated from assessment of mitral  
16 inflow and assessment of diastolic motion of the mitral plane using tissue Doppler imaging. Left  
17 atrial size is assessed using biplane planimetry, and longitudinal left atrial strain is estimated using  
18 2D speckle tracking. Aortic valve area is estimated by quantitative Doppler ultrasound using the  
19 continuity equation. LV outflow tract time-velocity integral is measures with pulsed-wave Doppler  
20 by placing the sample volume just below the region of flow convergence. Peak flow velocity across  
21 the valve is determined in the window with the highest velocity. AS severity is graded according to  
22 current guidelines (*secondary endpoints*).<sup>37</sup>  
23  
24  
25

#### 26 27 **9.5. Bone mineral-density, -geometry and -microstructure**

28 Using the images obtained from the multi-slice computed tomography the lumbar spine and hip can  
29 be evaluated. The currently available software from Mindways® allows for volumetric bone  
30 mineral-density of the trabecular compartment in the spine, thus making it possible to calculate T-  
31 and Z-scores for volumetric bone mineral density in the spine. At the hip both cortical, trabecular  
32 and total hip volumetric bone mineral density can be evaluated for the femoral neck, the trochanter  
33 region and femoral shaft. Again both T- and Z-scores can be calculated. The software also offers  
34 evaluation of the total bone area at the spine, and hip.  
35  
36  
37  
38  
39  
40  
41  
42  
43  
44  
45  
46  
47  
48  
49  
50  
51  
52  
53  
54  
55  
56  
57  
58  
59  
60

## 10. Figure legends

### Figure 1.

Timeline and applied tests, for details please see “Applied tests during the study”.

For peer review only



## 11. Reference List

- (1) Diederichsen AC, Rasmussen LM, Sogaard R et al. The Danish Cardiovascular Screening Trial (DANCAVAS): study protocol for a randomized controlled trial. *Trials* 2015;16:554.
- (2) Iung B, Baron G, Butchart EG et al. A prospective survey of patients with valvular heart disease in Europe: The Euro Heart Survey on Valvular Heart Disease. *Eur Heart J* 2003;24:1231-1243.
- (3) Nkomo VT, Gardin JM, Skelton TN, Gottdiener JS, Scott CG, Enriquez-Sarano M. Burden of valvular heart diseases: a population-based study. *Lancet* 2006;368:1005-1011.
- (4) New SE, Aikawa E. Molecular imaging insights into early inflammatory stages of arterial and aortic valve calcification. *Circ Res* 2011;108:1381-1391.
- (5) Pawade TA, Newby DE, Dweck MR. Calcification in Aortic Stenosis: The Skeleton Key. *J Am Coll Cardiol* 2015;66:561-577.
- (6) Marquis-Gravel G, Redfors B, Leon MB, Genereux P. Medical Treatment of Aortic Stenosis. *Circulation* 2016;134:1766-1784.
- (7) Rennenberg RJ, Schurgers LJ, Kroon AA, Stehouwer CD. Arterial calcifications. *J Cell Mol Med* 2010;14:2203-2210.
- (8) Danziger J, Young RL, Shea MK et al. Vitamin K-Dependent Protein Activity and Incident Ischemic Cardiovascular Disease: The Multi-Ethnic Study of Atherosclerosis. *Arterioscler Thromb Vasc Biol* 2016;36:1037-1042.
- (9) Viegas CS, Rafael MS, Enriquez JL et al. Gla-rich protein acts as a calcification inhibitor in the human cardiovascular system. *Arterioscler Thromb Vasc Biol* 2015;35:399-408.
- (10) Schurgers LJ, Uitto J, Reutelingsperger CP. Vitamin K-dependent carboxylation of matrix Gla-protein: a crucial switch to control ectopic mineralization. *Trends Mol Med* 2013;19:217-226.
- (11) Ronn SH, Harslof T, Pedersen SB, Langdahl BL. Vitamin K2 (menaquinone-7) prevents age-related deterioration of trabecular bone microarchitecture at the tibia in postmenopausal women. *Eur J Endocrinol* 2016;175:541-549.
- (12) Luo G, Ducy P, McKee MD et al. Spontaneous calcification of arteries and cartilage in mice lacking matrix GLA protein. *Nature* 1997;386:78-81.
- (13) Price PA, Faus SA, Williamson MK. Warfarin causes rapid calcification of the elastic lamellae in rat arteries and heart valves. *Arterioscler Thromb Vasc Biol* 1998;18:1400-1407.
- (14) Schurgers LJ, Spronk HM, Soute BA, Schiffers PM, DeMey JG, Vermeer C. Regression of warfarin-induced medial elastocalcinosis by high intake of vitamin K in rats. *Blood* 2007;109:2823-2831.
- (15) McCabe KM, Booth SL, Fu X et al. Dietary vitamin K and therapeutic warfarin alter the susceptibility to vascular calcification in experimental chronic kidney disease. *Kidney Int* 2013;83:835-844.

- 1  
2  
3  
4 (16) Kruger T, Oelenberg S, Kaesler N et al. Warfarin induces cardiovascular damage in mice. *Arterioscler Thromb Vasc Biol* 2013;33:2618-2624.  
5  
6  
7 (17) Rennenberg RJ, van Varik BJ, Schurgers LJ et al. Chronic coumarin treatment is associated with  
8 increased extracoronary arterial calcification in humans. *Blood* 2010;115:5121-5123.  
9  
10 (18) Weijs B, Blaauw Y, Rennenberg RJ et al. Patients using vitamin K antagonists show increased levels  
11 of coronary calcification: an observational study in low-risk atrial fibrillation patients. *Eur Heart J*  
12 2011;32:2555-2562.  
13  
14 (19) Schurgers LJ, Joosen IA, Laufer EM et al. Vitamin K-antagonists accelerate atherosclerotic  
15 calcification and induce a vulnerable plaque phenotype. *PLoS One* 2012;7:e43229.  
16  
17 (20) Chaikriangkrai K, Valderrabano M, Bala SK et al. Prevalence and Implications of Subclinical Coronary  
18 Artery Disease in Patients With Atrial Fibrillation. *Am J Cardiol* 2015;116:1219-1223.  
19  
20 (21) Yamamoto K, Yamamoto H, Takeuchi M et al. Risk Factors for Progression of Degenerative Aortic  
21 Valve Disease in the Japanese- The Japanese Aortic Stenosis Study (JASS) Prospective Analysis. *Circ J*  
22 2015;79:2050-2057.  
23  
24 (22) Schurgers LJ, Teunissen KJ, Knapen MH et al. Novel conformation-specific antibodies against matrix  
25 gamma-carboxyglutamic acid (Gla) protein: undercarboxylated matrix Gla protein as marker for  
26 vascular calcification. *Arterioscler Thromb Vasc Biol* 2005;25:1629-1633.  
27  
28 (23) Geleijnse JM, Vermeer C, Grobbee DE et al. Dietary intake of menaquinone is associated with a  
29 reduced risk of coronary heart disease: the Rotterdam Study. *J Nutr* 2004;134:3100-3105.  
30  
31 (24) Shea MK, O'Donnell CJ, Hoffmann U et al. Vitamin K supplementation and progression of coronary  
32 artery calcium in older men and women. *Am J Clin Nutr* 2009;89:1799-1807.  
33  
34 (25) Braam LA, Hoeks AP, Brouns F, Hamulyak K, Gerichhausen MJ, Vermeer C. Beneficial effects of  
35 vitamins D and K on the elastic properties of the vessel wall in postmenopausal women: a follow-up  
36 study. *Thromb Haemost* 2004;91:373-380.  
37  
38 (26) Knapen MH, Braam LA, Drummen NE, Bekers O, Hoeks AP, Vermeer C. Menaquinone-7  
39 supplementation improves arterial stiffness in healthy postmenopausal women. A double-blind  
40 randomised clinical trial. *Thromb Haemost* 2015;113:1135-1144.  
41  
42 (27) Dalmeijer GW, van der Schouw YT, Magdeleyns E, Ahmed N, Vermeer C, Beulens JW. The effect of  
43 menaquinone-7 supplementation on circulating species of matrix Gla protein. *Atherosclerosis*  
44 2012;225:397-402.  
45  
46 (28) Westenfeld R, Krueger T, Schlieper G et al. Effect of vitamin K2 supplementation on functional  
47 vitamin K deficiency in hemodialysis patients: a randomized trial. *Am J Kidney Dis* 2012;59:186-195.  
48  
49 (29) Caluwe R, Vandecasteele S, Van VB, Vermeer C, De Vriese AS. Vitamin K2 supplementation in  
50 haemodialysis patients: a randomized dose-finding study. *Nephrol Dial Transplant* 2014;29:1385-  
51 1390.  
52  
53  
54  
55  
56  
57  
58



- 1  
2  
3  
4 (30) Theuwissen E, Cranenburg EC, Knapen MH et al. Low-dose menaquinone-7 supplementation  
5 improved extra-hepatic vitamin K status, but had no effect on thrombin generation in healthy  
6 subjects. *Br J Nutr* 2012;108:1652-1657.  
7
- 8 (31) Pucaj K, Rasmussen H, Moller M, Preston T. Safety and toxicological evaluation of a synthetic  
9 vitamin K2, menaquinone-7. *Toxicol Mech Methods* 2011;21:520-532.  
10
- 11 (32) Paulsen NH, Carlsen BB, Dahl JS et al. Association between aortic valve calcification measured on  
12 non-contrast computed tomography and aortic valve stenosis in the general population. *J*  
13 *Cardiovasc Comput Tomogr* 2016;10:309-315.  
14
- 15 (33) Caluwe R, Pyfferoen L, De BK, De Vriese AS. The effects of vitamin K supplementation and vitamin K  
16 antagonists on progression of vascular calcification: ongoing randomized controlled trials. *Clin*  
17 *Kidney J* 2016;9:273-279.  
18
- 19 (34) Preston DL, Ron E, Tokuoka S et al. Solid cancer incidence in atomic bomb survivors: 1958-1998.  
20 *Radiat Res* 2007;168:1-64.  
21
- 22 (35) Einstein AJ, Knuuti J. Cardiac imaging: does radiation matter? *Eur Heart J* 2012;33:573-578.  
23
- 24 (36) Kvist TV, Lindholt JS, Rasmussen LM et al. The DanCavas Pilot Study of Multifaceted Screening for  
25 Subclinical Cardiovascular Disease in Men and Women Aged 65-74 Years. *Eur J Vasc Endovasc Surg*  
26 2017;53:123-131.  
27
- 28 (37) Baumgartner H, Hung J, Bermejo J et al. Echocardiographic assessment of valve stenosis: EAE/ASE  
29 recommendations for clinical practice. *J Am Soc Echocardiogr* 2009;22:1-23.  
30  
31  
32  
33  
34  
35  
36  
37  
38  
39  
40  
41  
42  
43  
44  
45  
46  
47  
48  
49  
50  
51  
52  
53  
54  
55  
56  
57  
58  
59  
60

## 12. Footnotes

### 12.1. Contributors

AD, JL, NEF and LMR conceived and designed the study. AD wrote the study protocol and is the principal investigator while JL, NEF and LMR are coinvestigators. MF is the clinical research fellow responsible for the running of the clinical trial. JD and JEM are responsible for the echocardiography protocol. Grazina Urbonaviciene (Silkeborg), Søren Warberg Becker (Silkeborg), Jess Lambrechtsen (Svendborg), Kenneth Egstrup (Svendborg), Flemming Hald (Vejle) and Martin Busk (Vejle), are site specific coinvestigators. LF is involved in the bone-related substudy. HM is representative for the DSMB. All authors have contributed to the revision of the manuscript.

### 12.2. Funding statement

The trial is supported by the Danish Heart Foundation [grant number 17-R116-A7569-22071], Region Syddanmarks Research council [grant number 17/15638] and the Novo Nordisk Foundation [grant number NNF17OC0029076].

The study-tablets, including placebo, are provided for free of charge by Kappa Bioscience A/S, Silurveien 2B, 0380 Oslo and Orkla Care, Industrigrenen 10, 2635 Ishøj. The companies are not involved in the execution of the study or analysis of the data.

### 12.3. Competing interests statement

None declared.

### 12.4. Ethics approval

The protocol is approved by the Regional Scientific Ethical Committee for Southern Denmark.

### 12.5. Data sharing statement:

Positive as well as negative findings will be reported via conference presentations and peer-reviewed publications. All the data will be available upon request.

| Month                    | Baseline | 3 | 6 | 9 | 12 | 15 | 18 | 21 | 24 | (27) | (30) |
|--------------------------|----------|---|---|---|----|----|----|----|----|------|------|
| Info and consent         | X        |   |   |   |    |    |    |    |    |      |      |
| Interview                | X        |   | X |   | X  |    | X  |    | X  |      | (X)  |
| Web based survey         |          | X |   | X |    | X  |    | X  |    | (X)  |      |
| Biochemical measurements | X        |   | X |   | X  |    | X  |    | X  |      | (X)  |
| Non-contrast CT          | X        |   |   |   | X  |    |    |    | X  |      | (X)  |
| Contrast CT              | X        |   |   |   |    |    |    |    | X  |      |      |
| Echocardiography         | X        |   |   |   | X  |    |    |    | X  |      | (X)  |

Timeline and applied tests, for details please see "Applied tests during the study".

180x34mm (96 x 96 DPI)

For peer review only

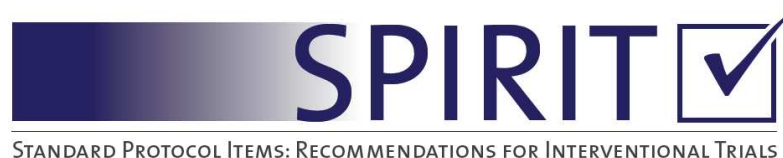

SPIRIT 2013 Checklist: Recommended items to address in a clinical trial protocol and related documents\*

| Section/item                      | Item No | Description                                                                                                                                                                                                                                                                              | Addressed on page number |
|-----------------------------------|---------|------------------------------------------------------------------------------------------------------------------------------------------------------------------------------------------------------------------------------------------------------------------------------------------|--------------------------|
| <b>Administrative information</b> |         |                                                                                                                                                                                                                                                                                          |                          |
| Title                             | 1       | Descriptive title identifying the study design, population, interventions, and, if applicable, trial acronym                                                                                                                                                                             | _____1_____              |
| Trial registration                | 2a      | Trial identifier and registry name. If not yet registered, name of intended registry                                                                                                                                                                                                     | _____2_____              |
|                                   | 2b      | All items from the World Health Organization Trial Registration Data Set                                                                                                                                                                                                                 | _____                    |
| Protocol version                  | 3       | Date and version identifier                                                                                                                                                                                                                                                              | _____1_____              |
| Funding                           | 4       | Sources and types of financial, material, and other support                                                                                                                                                                                                                              | _____15_____             |
| Roles and responsibilities        | 5a      | Names, affiliations, and roles of protocol contributors                                                                                                                                                                                                                                  | _____15_____             |
|                                   | 5b      | Name and contact information for the trial sponsor                                                                                                                                                                                                                                       | _____15_____             |
|                                   | 5c      | Role of study sponsor and funders, if any, in study design; collection, management, analysis, and interpretation of data; writing of the report; and the decision to submit the report for publication, including whether they will have ultimate authority over any of these activities | _____15_____             |
|                                   | 5d      | Composition, roles, and responsibilities of the coordinating centre, steering committee, endpoint adjudication committee, data management team, and other individuals or groups overseeing the trial, if applicable (see Item 21a for data monitoring committee)                         | _____7, 8, _____         |

1  
2  
3  
4  
5  
6  
7  
8  
9  
10  
11  
12  
13  
14  
15  
16  
17  
18  
19  
20  
21  
22  
23  
24  
25  
26  
27  
28  
29  
30  
31  
32  
33  
34  
35  
36  
37  
38  
39  
40  
41  
42  
43  
44  
45  
46  
47**Introduction**

|                          |    |                                                                                                                                                                                                           |           |
|--------------------------|----|-----------------------------------------------------------------------------------------------------------------------------------------------------------------------------------------------------------|-----------|
| Background and rationale | 6a | Description of research question and justification for undertaking the trial, including summary of relevant studies (published and unpublished) examining benefits and harms for each intervention        | ___4,5___ |
|                          | 6b | Explanation for choice of comparators                                                                                                                                                                     | _____     |
| Objectives               | 7  | Specific objectives or hypotheses                                                                                                                                                                         | ___5___   |
| Trial design             | 8  | Description of trial design including type of trial (eg, parallel group, crossover, factorial, single group), allocation ratio, and framework (eg, superiority, equivalence, noninferiority, exploratory) | ___5___   |

**Methods: Participants, interventions, and outcomes**

|                      |     |                                                                                                                                                                                                                                                                                                                                                                                |           |
|----------------------|-----|--------------------------------------------------------------------------------------------------------------------------------------------------------------------------------------------------------------------------------------------------------------------------------------------------------------------------------------------------------------------------------|-----------|
| Study setting        | 9   | Description of study settings (eg, community clinic, academic hospital) and list of countries where data will be collected. Reference to where list of study sites can be obtained                                                                                                                                                                                             | ___5___   |
| Eligibility criteria | 10  | Inclusion and exclusion criteria for participants. If applicable, eligibility criteria for study centres and individuals who will perform the interventions (eg, surgeons, psychotherapists)                                                                                                                                                                                   | ___5___   |
| Interventions        | 11a | Interventions for each group with sufficient detail to allow replication, including how and when they will be administered                                                                                                                                                                                                                                                     | ___5,6___ |
|                      | 11b | Criteria for discontinuing or modifying allocated interventions for a given trial participant (eg, drug dose change in response to harms, participant request, or improving/worsening disease)                                                                                                                                                                                 | ___6___   |
|                      | 11c | Strategies to improve adherence to intervention protocols, and any procedures for monitoring adherence (eg, drug tablet return, laboratory tests)                                                                                                                                                                                                                              | ___6___   |
|                      | 11d | Relevant concomitant care and interventions that are permitted or prohibited during the trial                                                                                                                                                                                                                                                                                  | _____     |
| Outcomes             | 12  | Primary, secondary, and other outcomes, including the specific measurement variable (eg, systolic blood pressure), analysis metric (eg, change from baseline, final value, time to event), method of aggregation (eg, median, proportion), and time point for each outcome. Explanation of the clinical relevance of chosen efficacy and harm outcomes is strongly recommended | ___6___   |
| Participant timeline | 13  | Time schedule of enrolment, interventions (including any run-ins and washouts), assessments, and visits for participants. A schematic diagram is highly recommended (see Figure)                                                                                                                                                                                               | ___6___   |

1  
2  
3 Sample size 14 Estimated number of participants needed to achieve study objectives and how it was determined, including 7  
4 clinical and statistical assumptions supporting any sample size calculations

5  
6 Recruitment 15 Strategies for achieving adequate participant enrolment to reach target sample size 8  
7

8 **Methods: Assignment of interventions (for controlled trials)**  
9

10 Allocation:

11 Sequence generation 16a Method of generating the allocation sequence (eg, computer-generated random numbers), and list of any 7  
12 factors for stratification. To reduce predictability of a random sequence, details of any planned restriction  
13 (eg, blocking) should be provided in a separate document that is unavailable to those who enrol participants  
14 or assign interventions  
15

16  
17 Allocation concealment mechanism 16b Mechanism of implementing the allocation sequence (eg, central telephone; sequentially numbered, 7  
18 opaque, sealed envelopes), describing any steps to conceal the sequence until interventions are assigned  
19  
20

21 Implementation 16c Who will generate the allocation sequence, who will enrol participants, and who will assign participants to 7  
22 interventions  
23

24 Blinding (masking) 17a Who will be blinded after assignment to interventions (eg, trial participants, care providers, outcome 7  
25 assessors, data analysts), and how  
26

27 17b If blinded, circumstances under which unblinding is permissible, and procedure for revealing a participant's 7  
28 allocated intervention during the trial  
29  
30

31 **Methods: Data collection, management, and analysis**  
32

33 Data collection methods 18a Plans for assessment and collection of outcome, baseline, and other trial data, including any related 7,8  
34 processes to promote data quality (eg, duplicate measurements, training of assessors) and a description of  
35 study instruments (eg, questionnaires, laboratory tests) along with their reliability and validity, if known.  
36 Reference to where data collection forms can be found, if not in the protocol  
37

38 18b Plans to promote participant retention and complete follow-up, including list of any outcome data to be 7,8  
39 collected for participants who discontinue or deviate from intervention protocols  
40  
41  
42  
43  
44

1  
2  
3  
4  
5  
6  
7  
8  
9  
10  
11  
12  
13  
14  
15  
16  
17  
18  
19  
20  
21  
22  
23  
24  
25  
26  
27  
28  
29  
30  
31  
32  
33  
34  
35  
36  
37  
38  
39  
40  
41  
42  
43  
44  
45  
46  
47

|                 |    |                                                                                                                                                                                                                                                                   |         |
|-----------------|----|-------------------------------------------------------------------------------------------------------------------------------------------------------------------------------------------------------------------------------------------------------------------|---------|
| Data management | 19 | Plans for data entry, coding, security, and storage, including any related processes to promote data quality (eg, double data entry; range checks for data values). Reference to where details of data management procedures can be found, if not in the protocol | ___8___ |
|-----------------|----|-------------------------------------------------------------------------------------------------------------------------------------------------------------------------------------------------------------------------------------------------------------------|---------|

|                     |     |                                                                                                                                                                          |         |
|---------------------|-----|--------------------------------------------------------------------------------------------------------------------------------------------------------------------------|---------|
| Statistical methods | 20a | Statistical methods for analysing primary and secondary outcomes. Reference to where other details of the statistical analysis plan can be found, if not in the protocol | ___7___ |
|---------------------|-----|--------------------------------------------------------------------------------------------------------------------------------------------------------------------------|---------|

|  |     |                                                                          |         |
|--|-----|--------------------------------------------------------------------------|---------|
|  | 20b | Methods for any additional analyses (eg, subgroup and adjusted analyses) | ___7___ |
|--|-----|--------------------------------------------------------------------------|---------|

|  |     |                                                                                                                                                                                 |         |
|--|-----|---------------------------------------------------------------------------------------------------------------------------------------------------------------------------------|---------|
|  | 20c | Definition of analysis population relating to protocol non-adherence (eg, as randomised analysis), and any statistical methods to handle missing data (eg, multiple imputation) | ___7___ |
|--|-----|---------------------------------------------------------------------------------------------------------------------------------------------------------------------------------|---------|

**Methods: Monitoring**

|                 |     |                                                                                                                                                                                                                                                                                                                                       |            |
|-----------------|-----|---------------------------------------------------------------------------------------------------------------------------------------------------------------------------------------------------------------------------------------------------------------------------------------------------------------------------------------|------------|
| Data monitoring | 21a | Composition of data monitoring committee (DMC); summary of its role and reporting structure; statement of whether it is independent from the sponsor and competing interests; and reference to where further details about its charter can be found, if not in the protocol. Alternatively, an explanation of why a DMC is not needed | ___8, 9___ |
|-----------------|-----|---------------------------------------------------------------------------------------------------------------------------------------------------------------------------------------------------------------------------------------------------------------------------------------------------------------------------------------|------------|

|  |     |                                                                                                                                                                         |           |
|--|-----|-------------------------------------------------------------------------------------------------------------------------------------------------------------------------|-----------|
|  | 21b | Description of any interim analyses and stopping guidelines, including who will have access to these interim results and make the final decision to terminate the trial | ___7,9___ |
|--|-----|-------------------------------------------------------------------------------------------------------------------------------------------------------------------------|-----------|

|       |    |                                                                                                                                                                                   |               |
|-------|----|-----------------------------------------------------------------------------------------------------------------------------------------------------------------------------------|---------------|
| Harms | 22 | Plans for collecting, assessing, reporting, and managing solicited and spontaneously reported adverse events and other unintended effects of trial interventions or trial conduct | ___6, 8, 9___ |
|-------|----|-----------------------------------------------------------------------------------------------------------------------------------------------------------------------------------|---------------|

|          |    |                                                                                                                                             |       |
|----------|----|---------------------------------------------------------------------------------------------------------------------------------------------|-------|
| Auditing | 23 | Frequency and procedures for auditing trial conduct, if any, and whether the process will be independent from investigators and the sponsor | _____ |
|----------|----|---------------------------------------------------------------------------------------------------------------------------------------------|-------|

**Ethics and dissemination**

|                          |    |                                                                                           |         |
|--------------------------|----|-------------------------------------------------------------------------------------------|---------|
| Research ethics approval | 24 | Plans for seeking research ethics committee/institutional review board (REC/IRB) approval | ___9___ |
|--------------------------|----|-------------------------------------------------------------------------------------------|---------|

|                     |    |                                                                                                                                                                                                                                  |       |
|---------------------|----|----------------------------------------------------------------------------------------------------------------------------------------------------------------------------------------------------------------------------------|-------|
| Protocol amendments | 25 | Plans for communicating important protocol modifications (eg, changes to eligibility criteria, outcomes, analyses) to relevant parties (eg, investigators, REC/IRBs, trial participants, trial registries, journals, regulators) | _____ |
|---------------------|----|----------------------------------------------------------------------------------------------------------------------------------------------------------------------------------------------------------------------------------|-------|

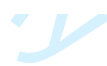

|    |                               |     |                                                                                                                                                                                                                                                                                     |           |
|----|-------------------------------|-----|-------------------------------------------------------------------------------------------------------------------------------------------------------------------------------------------------------------------------------------------------------------------------------------|-----------|
| 1  |                               |     |                                                                                                                                                                                                                                                                                     |           |
| 2  |                               |     |                                                                                                                                                                                                                                                                                     |           |
| 3  | Consent or assent             | 26a | Who will obtain informed consent or assent from potential trial participants or authorised surrogates, and how (see Item 32)                                                                                                                                                        | ___7,8___ |
| 4  |                               |     |                                                                                                                                                                                                                                                                                     |           |
| 5  |                               |     |                                                                                                                                                                                                                                                                                     |           |
| 6  |                               | 26b | Additional consent provisions for collection and use of participant data and biological specimens in ancillary studies, if applicable                                                                                                                                               | _____     |
| 7  |                               |     |                                                                                                                                                                                                                                                                                     |           |
| 8  | Confidentiality               | 27  | How personal information about potential and enrolled participants will be collected, shared, and maintained in order to protect confidentiality before, during, and after the trial                                                                                                | _____     |
| 9  |                               |     |                                                                                                                                                                                                                                                                                     |           |
| 10 |                               |     |                                                                                                                                                                                                                                                                                     |           |
| 11 | Declaration of interests      | 28  | Financial and other competing interests for principal investigators for the overall trial and each study site                                                                                                                                                                       | ___15___  |
| 12 |                               |     |                                                                                                                                                                                                                                                                                     |           |
| 13 |                               |     |                                                                                                                                                                                                                                                                                     |           |
| 14 | Access to data                | 29  | Statement of who will have access to the final trial dataset, and disclosure of contractual agreements that limit such access for investigators                                                                                                                                     | ___8___   |
| 15 |                               |     |                                                                                                                                                                                                                                                                                     |           |
| 16 |                               |     |                                                                                                                                                                                                                                                                                     |           |
| 17 | Ancillary and post-trial care | 30  | Provisions, if any, for ancillary and post-trial care, and for compensation to those who suffer harm from trial participation                                                                                                                                                       | _____     |
| 18 |                               |     |                                                                                                                                                                                                                                                                                     |           |
| 19 |                               |     |                                                                                                                                                                                                                                                                                     |           |
| 20 | Dissemination policy          | 31a | Plans for investigators and sponsor to communicate trial results to participants, healthcare professionals, the public, and other relevant groups (eg, via publication, reporting in results databases, or other data sharing arrangements), including any publication restrictions | ___8___   |
| 21 |                               |     |                                                                                                                                                                                                                                                                                     |           |
| 22 |                               |     |                                                                                                                                                                                                                                                                                     |           |
| 23 |                               |     |                                                                                                                                                                                                                                                                                     |           |
| 24 |                               |     |                                                                                                                                                                                                                                                                                     |           |
| 25 |                               | 31b | Authorship eligibility guidelines and any intended use of professional writers                                                                                                                                                                                                      | ___8___   |
| 26 |                               |     |                                                                                                                                                                                                                                                                                     |           |
| 27 |                               | 31c | Plans, if any, for granting public access to the full protocol, participant-level dataset, and statistical code                                                                                                                                                                     | _____     |
| 28 |                               |     |                                                                                                                                                                                                                                                                                     |           |
| 29 | <b>Appendices</b>             |     |                                                                                                                                                                                                                                                                                     |           |
| 30 |                               |     |                                                                                                                                                                                                                                                                                     |           |
| 31 | Informed consent materials    | 32  | Model consent form and other related documentation given to participants and authorised surrogates                                                                                                                                                                                  | _____     |
| 32 |                               |     |                                                                                                                                                                                                                                                                                     |           |
| 33 |                               |     |                                                                                                                                                                                                                                                                                     |           |
| 34 | Biological specimens          | 33  | Plans for collection, laboratory evaluation, and storage of biological specimens for genetic or molecular analysis in the current trial and for future use in ancillary studies, if applicable                                                                                      | ___10___  |
| 35 |                               |     |                                                                                                                                                                                                                                                                                     |           |
| 36 |                               |     |                                                                                                                                                                                                                                                                                     |           |

37 \*It is strongly recommended that this checklist be read in conjunction with the SPIRIT 2013 Explanation & Elaboration for important clarification on the items.  
 38 Amendments to the protocol should be tracked and dated. The SPIRIT checklist is copyrighted by the SPIRIT Group under the Creative Commons  
 39 "[Attribution-NonCommercial-NoDerivs 3.0 Unported](https://creativecommons.org/licenses/by-nc-nd/3.0/)" license.  
 40



# BMJ Open

## The effects of Menaquinone-7 supplementation in patients with aortic valves calcification: study protocol for a randomized controlled trial

|                                 |                                                                                                                                                                                                                                                                                                                                                                                                                                                                                                                                                                                                                                                                                                                                                                                                                                                                                                                                                                                                                                                                                                                                                                                                                                                                                                                                                                                                                                                                                                         |
|---------------------------------|---------------------------------------------------------------------------------------------------------------------------------------------------------------------------------------------------------------------------------------------------------------------------------------------------------------------------------------------------------------------------------------------------------------------------------------------------------------------------------------------------------------------------------------------------------------------------------------------------------------------------------------------------------------------------------------------------------------------------------------------------------------------------------------------------------------------------------------------------------------------------------------------------------------------------------------------------------------------------------------------------------------------------------------------------------------------------------------------------------------------------------------------------------------------------------------------------------------------------------------------------------------------------------------------------------------------------------------------------------------------------------------------------------------------------------------------------------------------------------------------------------|
| Journal:                        | <i>BMJ Open</i>                                                                                                                                                                                                                                                                                                                                                                                                                                                                                                                                                                                                                                                                                                                                                                                                                                                                                                                                                                                                                                                                                                                                                                                                                                                                                                                                                                                                                                                                                         |
| Manuscript ID                   | bmjopen-2018-022019.R1                                                                                                                                                                                                                                                                                                                                                                                                                                                                                                                                                                                                                                                                                                                                                                                                                                                                                                                                                                                                                                                                                                                                                                                                                                                                                                                                                                                                                                                                                  |
| Article Type:                   | Protocol                                                                                                                                                                                                                                                                                                                                                                                                                                                                                                                                                                                                                                                                                                                                                                                                                                                                                                                                                                                                                                                                                                                                                                                                                                                                                                                                                                                                                                                                                                |
| Date Submitted by the Author:   | 29-Apr-2018                                                                                                                                                                                                                                                                                                                                                                                                                                                                                                                                                                                                                                                                                                                                                                                                                                                                                                                                                                                                                                                                                                                                                                                                                                                                                                                                                                                                                                                                                             |
| Complete List of Authors:       | Lindholt, Jes; Odense Universitetshospital, Department of Cardiothoracic and Vascular Surgery; Odense Universitetshospital, Centre for Individualized Medicine in Arterial Diseases<br>Frandsen, Niels Erik<br>Fredgart, Maise; Odense Universitetshospital, Department of Cardiology<br>Øvrehus, Kristian; Odense Universitetshospital, Department of Cardiothoracic and Vascular Surgery<br>Dahl, Jordi; Odense Universitetshospital, Department of Cardiology<br>Møller, Jacob; Odense Universitetshospital, Department of Cardiology<br>Folkestad, Lars; Odense Universitetshospital, Department of Endocrinology<br>Urbonaviciene, Grazina; Regionshospitalet Silkeborg<br>Becker, Søren; Regionshospitalet Silkeborg<br>Lambrechtsen, Jess; Svendborg Sygehus, Department of Cardiology<br>Auscher, Søren; Svendborg Sygehus, Department of Cardiology<br>Hald, Flemming; Vejle Hospital, Department of cardiology<br>Busk, Martin; Sygehus Lillebalt Vejle Sygehus, Department of Cardiology<br>Rasmussen, Lars; Odense Universitetshospital, Department of Clinical Biochemistry and Pharmacology; Odense Universitetshospital, Centre for Individualized Medicine in Arterial Diseases<br>Gerke, Oke; Odense Universitetshospital, Department of Nuclear Medicine<br>Mickley, Hans; Odense Universitetshospital, Cardiology<br>Diederichsen, Axel; Odense Universitetshospital, Department of Cardiology; Odense Universitetshospital, Centre for Individualized Medicine in Arterial Diseases |
| <b>Primary Subject Heading</b>: | Cardiovascular medicine                                                                                                                                                                                                                                                                                                                                                                                                                                                                                                                                                                                                                                                                                                                                                                                                                                                                                                                                                                                                                                                                                                                                                                                                                                                                                                                                                                                                                                                                                 |
| Secondary Subject Heading:      | Pharmacology and therapeutics, Radiology and imaging, Diabetes and endocrinology                                                                                                                                                                                                                                                                                                                                                                                                                                                                                                                                                                                                                                                                                                                                                                                                                                                                                                                                                                                                                                                                                                                                                                                                                                                                                                                                                                                                                        |
| Keywords:                       | menaquinone-7, aortic valve calcification, Valvular heart disease < CARDIOLOGY, Calcium & bone < DIABETES & ENDOCRINOLOGY, Cardiovascular imaging < RADIOLOGY & IMAGING, randomized clinical trial                                                                                                                                                                                                                                                                                                                                                                                                                                                                                                                                                                                                                                                                                                                                                                                                                                                                                                                                                                                                                                                                                                                                                                                                                                                                                                      |

1  
2  
3  
4  
5  
6  
7  
8  
9  
10  
11  
12  
13  
14  
15  
16  
17  
18  
19  
20  
21  
22  
23  
24  
25  
26  
27  
28  
29  
30  
31  
32  
33  
34  
35  
36  
37  
38  
39  
40  
41  
42  
43  
44  
45  
46  
47  
48  
49  
50  
51  
52  
53  
54  
55  
56  
57  
58  
59  
60

For peer review only

# The effects of Menaquinone-7 supplementation in patients with aortic valves calcification: study protocol for a randomized controlled trial

## Acronym: The Aortic Valve DECalcification (AVADEC) trial

Authors: Jes Lindholt,<sup>1,2</sup> Niels Erik Frandsen,<sup>3</sup> Maise Høigaard Fredgart,<sup>4</sup> Kristian Øvrehus,<sup>4</sup> Jordi Sanchez Dahl,<sup>4</sup> Jacob Møller,<sup>4</sup> Lars Folkestad,<sup>5</sup> Grazina Urbonaviciene,<sup>6</sup> Søren Warberg Becker,<sup>6</sup> Jess Lambrechtsen,<sup>7</sup> Søren Auscher,<sup>7</sup> Flemming Hald,<sup>8</sup> Martin Busk,<sup>8</sup> Lars Melholt Rasmussen,<sup>2,9</sup> Oke Gerke,<sup>10</sup> Hans Mickley<sup>4</sup> and Axel Diederichsen<sup>2,4</sup>

<sup>1</sup> Department of Cardiothoracic and Vascular Surgery, Odense University Hospital, DENMARK

<sup>2</sup> Centre for Individualized Medicine in Arterial Diseases, DENMARK

<sup>3</sup> Kirkestenten 16, Skt Klemens, 5260 Odense S

<sup>4</sup> Department of Cardiology, Odense University Hospital, DENMARK

<sup>5</sup> Department of Endocrinology, Odense University Hospital, DENMARK

<sup>6</sup> Department of Cardiology, Silkeborg Hospital, DENMARK

<sup>7</sup> Department of Cardiology, Svendborg Hospital, DENMARK

<sup>8</sup> Department of Cardiology, Vejle Hospital, DENMARK

<sup>9</sup> Department of Department of Clinical Biochemistry and Pharmacology, Odense University Hospital, DENMARK

<sup>10</sup> Department of Nuclear Medicine, Odense University Hospital, DENMARK.

Corresponding author:

Axel Cosmus Pyndt Diederichsen

Department of Cardiology, Odense University Hospital, DENMARK

Postal address: J. B. Winsløvs Vej 4, 5000 Odense, DENMARK

Telephone number: +45 40191227

Mail: [axel.diederichsen@rsyd.dk](mailto:axel.diederichsen@rsyd.dk)

Word count (main text): 3559

Key words: menaquinone-7, aortic valve calcification, double-blind, randomized, placebo-controlled study

## 1. Abstract

### Introduction

Aortic stenosis is a common heart valve disease and due to the growing elderly population the prevalence is increasing. The disease is progressive with increasing calcification of the valve cusps. A few attempts with medical preventive treatment have failed, thus presently the only effective treatment of aortic stenosis is surgery. This study will examine the effect of menaquinone-7 (MK-7) supplementation on progression of aortic valve calcification (AVC). We hypothesize that MK-7 supplementation will slow down the calcification process.

### Method and analysis

In this multicenter and double-blinded placebo-controlled study, 400 men aged 65-74 years with substantial AVC are randomized (1:1) to treatment with MK-7 (720 µg/day) supplemented by the recommended daily dose of vitamin D (25 µg/day) or placebo treatment (no active treatment) for two years. Exclusion criteria are treatment with vitamin K antagonist or coagulation disorders. To evaluate AVC score, a non-contrast CT-scan is performed at baseline and repeated after 12 and 24 months of follow-up. Primary outcome is difference in AVC score from baseline to follow-up at two years. Intention-to-treat principle is used for all analyses.

### Ethics and dissemination

There are no reported adverse effects associated with the use of MK-7. The protocol is approved by the Regional Scientific Ethical Committee for Southern Denmark (S-20170059) and the Data Protection Agency (17/19010). It is conducted in accordance with the Declaration of Helsinki. Positive as well as negative findings will be reported.

### Trial registration number

ClinicalTrials.gov Identifier: NCT03243890.

### Strengths and limitations of this study

- The study is the first to investigate the effect of menaquinone-7 supplementation on progression of aortic valve calcification.
- Strengths include the stratified randomization, double-blind placebo-controlled design and being a multi-center trial.
- A clinical relevant dose of Menaquinone-7 supplementation is unknown, and accordingly the chosen dose might be insufficient.
- A confirmatory trial with clinical outcomes is needed, if progression of aortic valve calcification is decreased by menaquinone-7 supplementation.

For peer review only

## 2. Introduction

In the ongoing Danish Cardiovascular Screening (DANCAVAS) trial, we are randomizing (1:2) 45,000 Danish men aged 65-74 years to a screening examination comprising a non-contrast CT scan.<sup>1</sup> The purpose is to investigate whether an advanced cardiovascular screening will prevent death and cardiovascular events. In a supplementary PhD study, we have been studying aortic valve calcification (AVC). With prevalence ranging from 2 to 7%, aortic valve stenosis is the most common heart valve disease in the western world,<sup>2,3</sup> and combined with the rapidly growing elderly population it is likely that the prevalence will increase further in the future. Central in the pathogenesis is pro-osteogenic factors entailing active bone formation in the valve cusps and this drive disease progression.<sup>4,5</sup> To halt aortic stenosis progression preventive medical treatments with statins and bisphosphonates have been explored in randomized clinical trials, but with discouraging results. Thus at present medical treatment is not an option.<sup>6</sup>

In DANCAVAS, we have made an interesting observation. Patients on vitamin K antagonist (VKA) treatment had a significant increased AVC score (median 32 versus 11,  $p=0.004$ ). Adjusting for age, smoking, hypertension and cardiovascular disease, this was confirmed in binominal negative (IRR 1.70, 95% CI: 1.25-2.31) and logistic regression (OR 1.66, 95% CI 1.19-2.30) (unpublished results). Thus, in DANCAVAS, patients on VKA seem to have increased aortic valve calcifications.

### Vitamin K and the calcification process

Calcification is a slowly progressive process and caused by an imbalance between the mechanisms that promotes and inhibits the deposition of calcium in the vascular wall, and the vitamin K-dependent proteins play an essential role in this inhibition. The most familiar of the K vitamins are phyloquinone (VK1), as this is essential in activation of several coagulation factors, but menaquinone (MK) is another very important vitamin K species. MK is deemed necessary for  $\gamma$ -carboxylation of proteins involved inhibition of arterial calcification, i.e. matrix-Gla proteins (MGP).<sup>7-10</sup> Without these activated proteins, the balance of cellular calcium uptake and the mineralization process in bone and blood vessels is impaired. Additionally, clinical studies suggest that MK preserves bone structure.<sup>11</sup>

The inhibiting process of the vitamin K-dependent proteins was originally showed by Luo et al. in 1997.<sup>12</sup> In a mice model they described MGP to be an important inhibitor of calcification of arteries. In other animal studies, the inhibition of the vitamin K-dependent proteins by VKA resulted in arterial and soft tissue calcification.<sup>13-16</sup> These observations are in agreement with our findings from the DANCAVAS trial, and other human studies have also shown that long-term use of VKA is associated with both increased coronary- and extra-coronary vascular calcification.<sup>17-20</sup> Furthermore, in Japanese, the use of VKA was associated to exacerbate the risk of degenerative aortic valve disease.<sup>21</sup> Finally, low circulating MGP and an impaired carboxylation at its tissue site of expression is associated with the development and progression of cardiovascular disease.<sup>22</sup>

Since VKA seems to induce vascular calcification, MK intake may be beneficial to reduce these calcifications. No recommendations of MK are available; however, we know that the daily intake in the Western world is not sufficient to meet the request for a complete activation of MGP.

1  
2  
3  
4 Observational studies in healthy elderly have shown an inverse relationship between MK-4 intake  
5 and coronary artery calcification (CAC),<sup>23</sup> and VK1 did slow the progression of CAC after 3 years  
6 of follow-up.<sup>24</sup> Furthermore, VK1 and MK-7 decreased arterial stiffness and improved elastic  
7 properties of the carotid artery.<sup>25;26</sup> Dalmeijer et al. performed a randomized, double blind, placebo  
8 controlled trial to investigate the effect of MK-7 supplementation (180 µg/day, 360 µg/day or  
9 placebo) and found a dose-dependent decrease of uncarboxylated MGP concentrations.<sup>27</sup> Two  
10 subsequent studies in haemodialysis patients found an almost linear dose–response decrease of  
11 uncarboxylated MGP without an upper limit, with doses ranging between 360 µg/day and 1080 µg  
12 trice weekly.<sup>28;29</sup> In a supplementary study, MK-7 was well tolerated and did not cause a  
13 hypercoagulable state.<sup>30</sup> Finally, there is no documented toxicity for VK1 or MK-4, and MK-7, and  
14 the WHO has set no upper tolerance level for vitamin K intake.<sup>31</sup>

## 18 2.1. Hypothesis

19 In a randomized setup we test the hypothesis that supplementation with MK-7 (720 µg per day) and  
20 vitamin D (25 µg/day) in comparison to placebo will half the progression of further aortic valve  
21 calcification in patients with substantial valve calcification, but without aortic valve stenosis.  
22  
23

## 25 3. Methods

### 27 3.1. Trial design

28 The study is a double-blind, randomized, placebo-controlled study.  
29  
30

### 31 3.2. Participants

32 In DANCAVAS we are performing echocardiography in all participants with an AVC score above  
33 the 90% percentile (AVC score above 300).<sup>32</sup> Patients with an AVC score above 300, but without  
34 aortic valve stenosis are eligible patients in AVADEC.  
35  
36

37 Exclusion criteria are:

- 38 • Prior heart valve surgery
  - 39 • Known significant aortic valve disease (peak velocity  $\geq 3.0$  m/s)
  - 40 • History of venous thrombosis including pulmonary embolism
  - 41 • Coagulation disorders
  - 42 • VKA use
  - 43 • Disorders of calcium and phosphate metabolism
  - 44 • A life-expectancy < 5 years
- 45  
46  
47

48 The study takes place at Odense University Hospital, and the hospitals in Svendborg, Vejle and  
49 Silkeborg, Denmark, from 2018 to 2020.  
50

### 51 3.3. Intervention

52 In AVADEC, half of the patients are randomized to supplementation with MK-7 (720 µg/day)  
53 including the recommended daily dose of vitamin D (25 µg/day) and the other half to placebo  
54 treatment (no active treatment). Treatment of both groups will last for at least 24 months. During  
55  
56  
57  
58

1  
2  
3  
4 this time participants will visit our research unit five times, at 6-month intervals (Figure 1). To  
5 evaluate AVC score, we will perform a non-contrast CT-scan at baseline and after 12 and 24  
6 months of follow-up.  
7

### 8 **3.4. Outcome**

9 The *primary endpoint* is the change in AVC score from baseline to two years. The natural history of  
10 the aortic valve calcification is not adequately understood, and accordingly the changes are  
11 analyzed in two pre-specified patient subgroups (AVC score 300-599 and  $\geq 600$ , respectively).  
12  
13

14 *Secondary endpoints* are:

- 15 • Change in calcifications in the coronaries, carotid, aortic, renal, iliac and femoral arteries by  
16 non-contrast CT.
- 17 • Change in coronary and carotid plaque composition by contrast CT
- 18 • Change in aortic valve area by transthoracic echocardiography.
- 19 • Change in bone density as quantitative CT of the columna lumbalis and hip region.
- 20 • Change in MGP and osteocalcin with different phosphorylation (p and dp) and carboxylation  
21 forms (c and uc).
- 22 • Quality of life.
- 23
- 24
- 25

26 *Safety endpoints* are:

- 27 • Death
- 28 • Cardiovascular events (myocardial infarction, coronary revascularization, stroke, heart valve  
29 surgery, significant aortic disease (including dissection, ruptur and surgery) and significant  
30 peripheral artery disease (including thromboembolisms and surgery))
- 31 • Progressive aortic valve disease (more than 50% increase in AVC score)
- 32 • Venous thromboembolism including pulmonary embolism
- 33 • Bleeding (including intracranial bleeding and hemorrhage associated with a drop in hemoglobin  
34 of  $\geq 2$ mmol/l)
- 35 • Low-energy or spontaneous fracture
- 36 • Cancer, including solid and hematologic
- 37 • Significant deterioration in laboratory measurements (calcium, magnesium, albumin, phosphate,  
38 alkaline phosphatase, bone specific alkaline phosphatase, Parathyroid Hormone, vitamin D or  
39 Prothrombin time-International normalized ratio (PT-INR)).
- 40
- 41
- 42
- 43
- 44

### 45 **3.5 Sample size**

46 We are planning a study of a continuous response variable from independent control and  
47 experimental subjects with 1 control per experimental subject. The mean annual AVC progression  
48 is unknown, but based on data from the DANCAVAS study we estimate the progression to be 100  
49 units in two years with a joint standard deviation 67 units. We expect that the treatment will reduce  
50 the AVC progression by 20% (i.e. to 80), leading to the inclusion of 177 experimental subjects and  
51 177 control subjects to be able to reject the null hypothesis that the population means of the  
52 experimental and control groups are equal with probability (power) 0.8. The Type I error  
53  
54  
55  
56  
57  
58



1  
2  
3  
4 probability associated with this test of this null hypothesis is 0.05. Accordingly, 354 subjects are  
5 needed, but in order to account for drop-out 400 patients will be included.

6 Interim analysis: The sample size is based on two years of treatment. One member of the The data  
7 and safety monitoring board (HM) and a statistician (OG) will evaluate the available primary  
8 endpoint one-year data of approximately 100 patients around 01 July 2019 in order to assess  
9 whether the treatment period should be prolonged by six months. The number of patients to be  
10 included in this study is unaffected by the decision to prolong treatment by six months or not.  
11  
12

### 13 **3.6 Stratified randomization**

14 Subjects will be randomized 1:1 after stratification for site (Odense University Hospital, Svendborg  
15 Hospital, Vejle Hospital or Silkeborg Hospital), and AVC score (300-599 or  $\geq 600$ ). Each site will  
16 be provided with sequentially numbered, opaque and sealed envelopes containing randomly  
17 generated treatment allocations. Two types of envelopes are provided; 1) AVC 300-599; and 2)  
18 AVC  $\geq 600$ .  
19  
20  
21

### 22 **3.7 Blinding**

23 The randomization-list is available to the data and safety monitoring board, but patients, nurses,  
24 physicians and other data collectors are kept blinded to the allocation during the study. The placebo  
25 is matched to the study drug for taste, color, and size.  
26  
27

### 28 **3.8 Statistical methods**

29 We will use the intention-to-treat principle for all analyses. The primary endpoint (change in AVC  
30 score) will be presented as continuous variables. Additionally, the changes are analyzed in two pre-  
31 specified patient subgroups (AVC score 300-599 and  $\geq 600$ , respectively). Primary hypothesis  
32 testing will be done hierarchically to maintain a closed testing procedure: only if the overall  
33 treatment effect is statistically significant, testing in AVC strata will be performed with  
34 confirmatory intent, otherwise solely for explorative reasons. Secondary endpoints include 1)  
35 change in calcifications in the coronaries, carotid, aortic, renal, iliac and femoral arteries; 2) change  
36 in coronary and carotid plaque composition by contrast CT; 3) change in aortic valve area by  
37 transthoracic echocardiography and 4) change in bone-density, -geometry and -microstructure as  
38 quantitative CT of the columna lumbalis and hip region.  
39  
40

41 We use general linear models (employing group, time point, and group x time point interaction) for  
42 the primary and for secondary endpoints as well as potential harms. Missing data will be treated as  
43 such; supplementary sensitivity analyses making use of imputed values under the missing at random  
44 assumption will be conducted for the primary analysis if more than 5% of expected data points will  
45 be missing.  
46  
47  
48  
49

## 50 **4. Organization**

51 The study is a part of the DANCAVAS trial, and conducted in collaboration with Centre for  
52 Individualized Medicine in Arterial Diseases (CIMA). The DANCAVAS secretariat at OUH will  
53 identify eligible patients in the DANCAVAS database, and an invitation is send by mail to these  
54 patients. If a patient is interested, he is invited to the local site to discuss the trial with a study nurse.  
55  
56  
57  
58

1  
2  
3  
4 If he is willing to participate in the study, informed consent is obtained, and he is randomly  
5 assigned to the MK-7 or placebo group. Nurses, radiographers, biomedical technicians and a PhD  
6 student are responsible for the treatment and examinations. During the study, only the independent  
7 data and safety monitoring board will have access to the complete database including the  
8 randomization-list. The data registration is performed via REDCap (Research Electronic Data  
9 Capture) with logging and secure storage directly on a server under Odense Patient data Explorative  
10 Network (OPEN), Region of Southern Denmark.

11  
12 *The Executive Committee*, consisting Professor Jes Lindholt (JL, Department of Cardiothoracic and  
13 Vascular Surgery, OUH), MD Niels Erik Frandsen (NEF) and associate professor Axel  
14 Diederichsen (AD, Department of Cardiology, OUH) conceived and designed the study, and will  
15 handle the decisions regarding the overall organization including administration, budget and use of  
16 the database.

17  
18  
19 *The Steering Committee* will consist of the members of the executive committee, and Jordi Dahl  
20 (JD, Department of Cardiology, OUH), Professor Lars Melholt Rasmussen (LMR, Department of  
21 Clinical Biochemistry and Pharmacology) both OUH, and two from each screening site. All  
22 practical issues concerning the treatment and data sampling will be handled by the steering  
23 committee.

24  
25 *The data and safety monitoring board (DSMB)* consists of the following experts: Professor of  
26 Cardiology Hans Mickley (HM, OUH), Professor of Cardiology and Clinical Epidemiology  
27 Christian Torp-Pedersen (Aalborg University) and Professor of Cardiology Lars Køber  
28 (Rigshospitalet), who all have large have experience with clinical randomized trials.

## 31 32 **5. Publication**

33 Project results reporting the primary endpoint will be published in peer reviewed international  
34 journals. The order of the authors will be PhD student (to be appointed), JL, JD, LF, two from each  
35 screening site, LMR, NEF and AD. Positive as well as negative findings will be reported.

## 36 37 38 39 **6. Feasibility**

40 By December 2017 more than 10000 participants have been included in DANCAVAS, and 800 of  
41 these are eligible to participate in AVADEC. Thus we are able to identify enough participants. AD  
42 and JL are PI's of the main study, DANCAVAS. In addition, several experts assist with AVADEC:  
43 JD is an expert in aortic stenosis, LMR is an expert in biochemistry, while PhD Lars Folkestad (LF)  
44 has undertaken several studies in bone-density, -geometry and -microstructure. In addition, local  
45 cardiologist from Vejle, Svendborg and Silkeborg will be responsible for securing local practical  
46 feasibility of the project at the specific screening sites.

## 47 48 49 50 51 **7. Safety and Ethics**

52 Pure natural MK-7 is used in the study. A daily dose at 720 µg MK-7 has not been examined on  
53 patients with aortic stenosis, but in a Belgian dose-finding study using 360, 720 or 1080 µg of MK-  
54 7 thrice weekly for 8 weeks in chronic haemodialysis patients no severe adverse effects were  
55

1  
2  
3  
4 observed.<sup>29</sup> Presently the Belgian group are performing a randomized trial exploring the efficacy of  
5 2000 µg MK-7 thrice weekly.<sup>33</sup> MK-7 is well tolerated and does not cause a hypercoagulable  
6 state.<sup>30</sup> There are no reported adverse effects associated with the use of MK-7.<sup>31</sup>  
7

8 Each patient has three CT scans during the study. Epidemiological studies do suggest that radiation  
9 exposure is associated with a slightly increased risk of cancer. The best studied cohort is the  
10 Japanese atomic bomb survivor cohort. In a group exposed to a mean radiation dose of 29 mSv, an  
11 excess of solid cancers – corresponding to an excess relative risk of 2% – were observed.<sup>34</sup> No large  
12 studies involving medically exposed adult cohorts are available, but a linear no-threshold model has  
13 been considered. Thus, there may be no minimal radiation dose for an increased cancer risk, and the  
14 risk increases linearly with the radiation dose. The average dose of one non-contrast CT scan is 3  
15 mSv. Two additionally contrast CT scans are performed (baseline and 24 months) with an average  
16 dose of 3 mSv each, thus at average the participants in AVADEC will receive 15 mSv. For  
17 comparison, the annual background radiation dose in Denmark is 3 mSv, and the average annual  
18 limit for radiation workers is 20 mSv.<sup>35</sup>  
19  
20  
21  
22

23 An independent DSMB is established to perform ongoing safety surveillance. None of the DSMB-  
24 members are directly or indirectly involved in the coordination, execution or analysis of the study.  
25 The following is assessed: 1) death, myocardial infarction, coronary revascularization, stroke, heart  
26 valve surgery and venous thromboembolism, 2) progressive aortic valve disease, and 3) laboratory  
27 measurements (Calcium, Magnesium, Albumin, Phosphate and alkaline phosphatase, bone specific  
28 alkaline phosphatase, Parathyroid Hormone and vitamin D or Prothrombin time-International  
29 normalized ratio (PT-INR)). If there is a reason for concern, the DSMB can advise to interrupt  
30 the study for further analysis, and the study can be terminated prematurely if the number of severe  
31 adverse events is significantly higher in the treatment group versus the placebo group. This will be  
32 discussed in a meeting with the investigators and DSMB. The investigator will inform the subjects  
33 in case of interruption or termination of the study.  
34  
35  
36

37 Subjects can leave the study at any time for any reason if they wish to do so, without any  
38 consequences. The investigator can decide to withdraw a subject from the study for urgent medical  
39 reasons or in case of demonstrable poor adherence to the study medication. This is assessed by  
40 interview and pill-count. If subjects are required to take VKA during the course of the study they  
41 will be withdrawn.  
42  
43

44 The protocol is approved by the Regional Scientific Ethical Committee for Southern Denmark (S-  
45 20170059) and the Data Protection Agency (17/19010). It is conducted in accordance with the  
46 Declaration of Helsinki. According to Danish legislation vitamin K is a dietary supplement, and  
47 accordingly license from the Danish Medicines Agency is not needed. Written informed consent is  
48 obtained from each participant. The study is registered at [clinicaltrials.gov](http://clinicaltrials.gov): NCT03243890.  
49  
50  
51

## 52 8. Discussion

53 Aortic stenosis is a common heart valve disease and due to the growing elderly population the  
54 prevalence is increasing. The disease is progressive with increasing calcification of the valve cusps.  
55  
56  
57  
58

1  
2  
3  
4 A few attempts with medical preventive treatment have failed, thus presently the only effective  
5 treatment of aortic stenosis is surgery. This study will examine the effect of MK-7 supplementation  
6 on progression of AVC in a randomized, placebo-controlled study. We hypothesize that MK-7  
7 supplementation will slow down the progression of valves calcification. If positive effects are  
8 shown a new treatment options may be available to prevent progression of aortic valve calcification.  
9 The result of this study will be expected at in 2021.  
10  
11  
12

## 13 **9. Applied tests during the study**

### 14 **9.1. Medical interview**

15  
16 At baseline, all relevant data are supplied from the DANCAVAS trial (e.g. AVC score, medical  
17 history and lifestyle factors).<sup>1</sup> At every visit, an interview is conducted and evaluating the  
18 following: incident cardiovascular disease, dyspnea, chest pain and quality of life (EurQol 5D).  
19  
20

### 21 **9.2. Laboratory Assessment**

22 Blood samples are obtained at every visit. Routine parameters include:

- 23 • Circulating MGP species with different phosphorylation (p and dp) and carboxylation forms (c  
24 and uc) are measured using a sandwich enzyme-linked immunosorbent assay (ELISA) based on  
25 monoclonal antibodies.
- 26 • Creatinine (eGFR), Natrium, Potassium, Calcium, Magnesium, Albumin, Phosphate, alkaline  
27 phosphatase, bone specific alkaline phosphatase, Parathyroid Hormone, Vitamin D and INR.

28 As a part of the study, a biobank at baseline and after 24 months will be organized. 40 mL of blood  
29 form each of the participants are centrifuged, labeled, and stored at -80°C until serial testing.  
30  
31  
32

### 33 **9.3. Multi-Slice Computed Tomography Scans**

34 CT scans will be performed using a high end CT- scanner like dual-source CT-scanner (Somatom  
35 Definition Flash, Siemens Medical Solutions, Forchheim, Germany). To assess the AVC scores the  
36 following CT settings are used: Gantry rotation time 0.28 s, 3.0 mm collimation, acquisition 128 x  
37 0.6 mm, 120 kV tube voltage, 90 mAs tube current, and a prospectively electrocardiographic (ECG)  
38 -triggered scan (gating at 65%-75% of the R-R interval if the heart rate were <75 or at 250-400ms  
39 after the QRS-complex if heart rate were >75). Calculation of the AVC scores is performed off-line  
40 by summing-up all spots of calcifications in the aortic valve area. AVC is defined as calcification  
41 below the ostia of the coronaries in the aortic sinus Valsalva, within the valve leaflet, or in the aortic  
42 annulus.<sup>36</sup> The CAC score is assessed as previously described.<sup>32</sup> To assess the calcifications in the  
43 carotid, aortic, renal, iliac and femoral arteries a CT scanning proximal from the mandibular bone  
44 and distally to the proximal third of the femur are performed with the following settings: Spiral scan  
45 with a pitch of 3.2 (Flash), 100 kV tube voltage, 90 mAs, collimation of 128 x 0.6mm, Safire 3 and  
46 slice thickness 5 mm. The calcifications scores are measured using the Agatston method.  
47  
48  
49  
50

51 To examine vessel plaques in the coronaries and carotid arteries, an ordinary contrast CT will be  
52 performed. The scanning protocol depends on the local CT scanner. Typically 80–100 mL of  
53 contrast agent are injected into an antecubital vein at a rate of 6.0 mL/s followed by 60 mL  
54  
55  
56  
57  
58

1  
2  
3  
4 intravenous saline (6.0 mL/s) using a dual-head power injector. A prospectively gated high pitch  
5 spiral “flash” protocol will be used in patients with a stable heart rate <60 beats per minute (bpm).  
6 In patients with a stable heart rate between 60 and 90 bpm, intravenously  $\beta$ -blocker is typically  
7 injected until the heart rate is appropriate, and a prospectively gated axial “adaptive sequence”  
8 protocol is used. In patients with a heart rate > 90 bpm or in case of an irregular heart rhythm, a  
9 retrospectively gated “helical” protocol with dose modulation will be used. Data acquisition  
10 parameters are 2\*128\*0.6 mm slice collimation, a gantry rotation time of 280 ms and a tube voltage  
11 of 100 or 120 kV depending on patients’ height and weight. The coronary artery tree will be  
12 analyzed for the presence and severity of CAD, according to the classification of the American  
13 Heart Association 16-segment model. Coronary plaques are defined as visible structures within or  
14 adjacent to the coronary artery lumen, which can be clearly distinguished from the vessel lumen and  
15 the surrounding pericardial tissue. Quantification of coronary plaque components is done via semi-  
16 automated analysis. Scans are analyzed an experienced cardiologist.  
17  
18  
19  
20

#### 21 **9.4 Echocardiographic measurements**

22 A comprehensive transthoracic echocardiography is performed at baseline and hereafter annually.  
23 Left ventricle (LV) volume and ejection fraction (EF) are estimated. LV longitudinal function is  
24 assessed using global strain analysis. LV remodelling is assessed by relative wall thickness and LV  
25 mass using the Devereaux formula. LV filling pressure is estimated from assessment of mitral  
26 inflow and assessment of diastolic motion of the mitral plane using tissue Doppler imaging. Left  
27 atrial size is assessed using biplane planimetry, and longitudinal left atrial strain is estimated using  
28 2D speckle tracking. Aortic valve area is estimated by quantitative Doppler ultrasound using the  
29 continuity equation. LV outflow tract time-velocity integral is measured with pulsed-wave Doppler  
30 by placing the sample volume just below the region of flow convergence. Peak flow velocity across  
31 the valve is determined in the window with the highest velocity. AS severity is graded according to  
32 current guidelines (*secondary endpoints*).<sup>37</sup>  
33  
34  
35  
36

#### 37 **9.5. Bone mineral-density, -geometry and -microstructure**

38 Using the images obtained from the multi-slice computed tomography the lumbar spine and hip can  
39 be evaluated. The currently available software from Mindways® allows for volumetric bone  
40 mineral-density of the trabecular compartment in the spine, thus making it possible to calculate T-  
41 and Z-scores for volumetric bone mineral density in the spine. At the hip both cortical, trabecular  
42 and total hip volumetric bone mineral density can be evaluated for the femoral neck, the trochanter  
43 region and femoral shaft. Again both T- and Z-scores can be calculated. The software also offers  
44 evaluation of the total bone area at the spine, and hip.  
45  
46  
47  
48  
49  
50  
51  
52  
53  
54  
55  
56  
57  
58  
59  
60

1  
2  
3  
4  
5  
6  
7  
8  
9  
10  
11  
12  
13  
14  
15  
16  
17  
18  
19  
20  
21  
22  
23  
24  
25  
26  
27  
28  
29  
30  
31  
32  
33  
34  
35  
36  
37  
38  
39  
40  
41  
42  
43  
44  
45  
46  
47  
48  
49  
50  
51  
52  
53  
54  
55  
56  
57  
58  
59  
60

## 10. Figure legends

### Figure 1.

Timeline and applied tests, for details please see “Applied tests during the study”.

For peer review only



## 11. Reference List

- (1) Diederichsen AC, Rasmussen LM, Sogaard R et al. The Danish Cardiovascular Screening Trial (DANCAVAS): study protocol for a randomized controlled trial. *Trials* 2015;16:554.
- (2) Iung B, Baron G, Butchart EG et al. A prospective survey of patients with valvular heart disease in Europe: The Euro Heart Survey on Valvular Heart Disease. *Eur Heart J* 2003;24:1231-1243.
- (3) Nkomo VT, Gardin JM, Skelton TN, Gottdiener JS, Scott CG, Enriquez-Sarano M. Burden of valvular heart diseases: a population-based study. *Lancet* 2006;368:1005-1011.
- (4) New SE, Aikawa E. Molecular imaging insights into early inflammatory stages of arterial and aortic valve calcification. *Circ Res* 2011;108:1381-1391.
- (5) Pawade TA, Newby DE, Dweck MR. Calcification in Aortic Stenosis: The Skeleton Key. *J Am Coll Cardiol* 2015;66:561-577.
- (6) Marquis-Gravel G, Redfors B, Leon MB, Genereux P. Medical Treatment of Aortic Stenosis. *Circulation* 2016;134:1766-1784.
- (7) Rennenberg RJ, Schurgers LJ, Kroon AA, Stehouwer CD. Arterial calcifications. *J Cell Mol Med* 2010;14:2203-2210.
- (8) Danziger J, Young RL, Shea MK et al. Vitamin K-Dependent Protein Activity and Incident Ischemic Cardiovascular Disease: The Multi-Ethnic Study of Atherosclerosis. *Arterioscler Thromb Vasc Biol* 2016;36:1037-1042.
- (9) Viegas CS, Rafael MS, Enriquez JL et al. Gla-rich protein acts as a calcification inhibitor in the human cardiovascular system. *Arterioscler Thromb Vasc Biol* 2015;35:399-408.
- (10) Schurgers LJ, Uitto J, Reutelingsperger CP. Vitamin K-dependent carboxylation of matrix Gla-protein: a crucial switch to control ectopic mineralization. *Trends Mol Med* 2013;19:217-226.
- (11) Ronn SH, Harslof T, Pedersen SB, Langdahl BL. Vitamin K2 (menaquinone-7) prevents age-related deterioration of trabecular bone microarchitecture at the tibia in postmenopausal women. *Eur J Endocrinol* 2016;175:541-549.
- (12) Luo G, Ducy P, McKee MD et al. Spontaneous calcification of arteries and cartilage in mice lacking matrix GLA protein. *Nature* 1997;386:78-81.
- (13) Price PA, Faus SA, Williamson MK. Warfarin causes rapid calcification of the elastic lamellae in rat arteries and heart valves. *Arterioscler Thromb Vasc Biol* 1998;18:1400-1407.
- (14) Schurgers LJ, Spronk HM, Soute BA, Schiffers PM, DeMey JG, Vermeer C. Regression of warfarin-induced medial elastocalcinosis by high intake of vitamin K in rats. *Blood* 2007;109:2823-2831.
- (15) McCabe KM, Booth SL, Fu X et al. Dietary vitamin K and therapeutic warfarin alter the susceptibility to vascular calcification in experimental chronic kidney disease. *Kidney Int* 2013;83:835-844.

- 1  
2  
3  
4 (16) Kruger T, Oelenberg S, Kaesler N et al. Warfarin induces cardiovascular damage in mice. *Arterioscler Thromb Vasc Biol* 2013;33:2618-2624.  
5  
6  
7 (17) Rennenberg RJ, van Varik BJ, Schurgers LJ et al. Chronic coumarin treatment is associated with  
8 increased extracoronary arterial calcification in humans. *Blood* 2010;115:5121-5123.  
9  
10 (18) Weijs B, Blaauw Y, Rennenberg RJ et al. Patients using vitamin K antagonists show increased levels  
11 of coronary calcification: an observational study in low-risk atrial fibrillation patients. *Eur Heart J*  
12 2011;32:2555-2562.  
13  
14 (19) Schurgers LJ, Joosen IA, Laufer EM et al. Vitamin K-antagonists accelerate atherosclerotic  
15 calcification and induce a vulnerable plaque phenotype. *PLoS One* 2012;7:e43229.  
16  
17 (20) Chaikriangkrai K, Valderrabano M, Bala SK et al. Prevalence and Implications of Subclinical Coronary  
18 Artery Disease in Patients With Atrial Fibrillation. *Am J Cardiol* 2015;116:1219-1223.  
19  
20 (21) Yamamoto K, Yamamoto H, Takeuchi M et al. Risk Factors for Progression of Degenerative Aortic  
21 Valve Disease in the Japanese- The Japanese Aortic Stenosis Study (JASS) Prospective Analysis. *Circ J*  
22 2015;79:2050-2057.  
23  
24 (22) Schurgers LJ, Teunissen KJ, Knapen MH et al. Novel conformation-specific antibodies against matrix  
25 gamma-carboxyglutamic acid (Gla) protein: undercarboxylated matrix Gla protein as marker for  
26 vascular calcification. *Arterioscler Thromb Vasc Biol* 2005;25:1629-1633.  
27  
28 (23) Geleijnse JM, Vermeer C, Grobbee DE et al. Dietary intake of menaquinone is associated with a  
29 reduced risk of coronary heart disease: the Rotterdam Study. *J Nutr* 2004;134:3100-3105.  
30  
31 (24) Shea MK, O'Donnell CJ, Hoffmann U et al. Vitamin K supplementation and progression of coronary  
32 artery calcium in older men and women. *Am J Clin Nutr* 2009;89:1799-1807.  
33  
34 (25) Braam LA, Hoeks AP, Brouns F, Hamulyak K, Gerichhausen MJ, Vermeer C. Beneficial effects of  
35 vitamins D and K on the elastic properties of the vessel wall in postmenopausal women: a follow-up  
36 study. *Thromb Haemost* 2004;91:373-380.  
37  
38 (26) Knapen MH, Braam LA, Drummen NE, Bekers O, Hoeks AP, Vermeer C. Menaquinone-7  
39 supplementation improves arterial stiffness in healthy postmenopausal women. A double-blind  
40 randomised clinical trial. *Thromb Haemost* 2015;113:1135-1144.  
41  
42 (27) Dalmeijer GW, van der Schouw YT, Magdeleyns E, Ahmed N, Vermeer C, Beulens JW. The effect of  
43 menaquinone-7 supplementation on circulating species of matrix Gla protein. *Atherosclerosis*  
44 2012;225:397-402.  
45  
46 (28) Westenfeld R, Krueger T, Schlieper G et al. Effect of vitamin K2 supplementation on functional  
47 vitamin K deficiency in hemodialysis patients: a randomized trial. *Am J Kidney Dis* 2012;59:186-195.  
48  
49 (29) Caluwe R, Vandecasteele S, Van VB, Vermeer C, De Vriese AS. Vitamin K2 supplementation in  
50 haemodialysis patients: a randomized dose-finding study. *Nephrol Dial Transplant* 2014;29:1385-  
51 1390.  
52  
53  
54  
55  
56  
57  
58



- 1  
2  
3  
4 (30) Theuwissen E, Cranenburg EC, Knapen MH et al. Low-dose menaquinone-7 supplementation  
5 improved extra-hepatic vitamin K status, but had no effect on thrombin generation in healthy  
6 subjects. *Br J Nutr* 2012;108:1652-1657.  
7
- 8 (31) Pucaj K, Rasmussen H, Moller M, Preston T. Safety and toxicological evaluation of a synthetic  
9 vitamin K2, menaquinone-7. *Toxicol Mech Methods* 2011;21:520-532.  
10
- 11 (32) Paulsen NH, Carlsen BB, Dahl JS et al. Association between aortic valve calcification measured on  
12 non-contrast computed tomography and aortic valve stenosis in the general population. *J*  
13 *Cardiovasc Comput Tomogr* 2016;10:309-315.  
14
- 15 (33) Caluwe R, Pyfferoen L, De BK, De Vriese AS. The effects of vitamin K supplementation and vitamin K  
16 antagonists on progression of vascular calcification: ongoing randomized controlled trials. *Clin*  
17 *Kidney J* 2016;9:273-279.  
18
- 19 (34) Preston DL, Ron E, Tokuoka S et al. Solid cancer incidence in atomic bomb survivors: 1958-1998.  
20 *Radiat Res* 2007;168:1-64.  
21
- 22 (35) Einstein AJ, Knuuti J. Cardiac imaging: does radiation matter? *Eur Heart J* 2012;33:573-578.  
23
- 24 (36) Kvist TV, Lindholt JS, Rasmussen LM et al. The DanCavas Pilot Study of Multifaceted Screening for  
25 Subclinical Cardiovascular Disease in Men and Women Aged 65-74 Years. *Eur J Vasc Endovasc Surg*  
26 2017;53:123-131.  
27
- 28 (37) Baumgartner H, Hung J, Bermejo J et al. Echocardiographic assessment of valve stenosis: EAE/ASE  
29 recommendations for clinical practice. *J Am Soc Echocardiogr* 2009;22:1-23.  
30  
31  
32  
33  
34  
35  
36  
37  
38  
39  
40  
41  
42  
43  
44  
45  
46  
47  
48  
49  
50  
51  
52  
53  
54  
55  
56  
57  
58  
59  
60

## 12. Footnotes

### 12.1. Contributors

AD, JL, NEF and LMR conceived and designed the study. AD wrote the study protocol and is the principal investigator while JL, NEF and LMR are coinvestigators. MF is the clinical research fellow responsible for the running of the clinical trial. Kristian Øvrehus is responsible for the Cardiac-CT contrast protocol. JD and Jacob E Møller are responsible for the echocardiography protocol. Grazina Urbonaviciene (Silkeborg), Søren Warberg Becker (Silkeborg), Jess Lambrechtsen (Svendborg), Søren Auscher (Svendborg), Flemming Hald (Vejle) and Martin Busk (Vejle), are site specific coinvestigators. LF is involved in the bone-related substudy. Oke Gerke is responsible for statistics. HM is representative for the DSMB. All authors have contributed to the revision of the manuscript.

### 12.2. Patient and Public Involvement

Patients and public were not involved in the design of study, but as members of the Regional Scientific Ethical Committee for Southern Denmark the public have approved the written participant information.

### 12.3. Funding statement

The trial is supported by the Danish Heart Foundation [grant number 17-R116-A7569-22071], Region of Southern Denmark's Research council [grant number 17/15638] and the Novo Nordisk Foundation [grant number NNF17OC0029076].

The study-tablets, including placebo, are provided for free of charge by Kappa Bioscience A/S, Silurveien 2B, 0380 Oslo and Orkla Care, Industrigrenen 10, 2635 Ishøj. The companies are not involved in the execution of the study or analysis of the data.

### 12.4. Competing interests statement

None declared.

### 12.5. Ethics approval

The protocol is approved by the Regional Scientific Ethical Committee for Southern Denmark.

### 12.6. Data sharing statement:

Positive as well as negative findings will be reported via conference presentations and peer-reviewed publications. All the data will be available upon request.

| Month                    | 0 | 3 | 6 | 9 | 12 | 15 | 18 | 21 | 24 | (27) | (30) |
|--------------------------|---|---|---|---|----|----|----|----|----|------|------|
| Informed consent         | X |   |   |   |    |    |    |    |    |      |      |
| Medical interview        | X |   | X |   | X  |    | X  |    | X  |      | (X)  |
| Web-based survey         |   | X |   | X |    | X  |    | X  |    | (X)  |      |
| Biochemical measurements | X |   | X |   | X  |    | X  |    | X  |      | (X)  |
| Non-contrast CT          | X |   |   |   | X  |    |    |    | X  |      | (X)  |
| Contrast CT              | X |   |   |   |    |    |    |    | X  |      |      |
| Echocardiography         | X |   |   |   | X  |    |    |    | X  |      | (X)  |

Timeline and applied tests, for details please see "Applied tests during the study".

154x75mm (300 x 300 DPI)

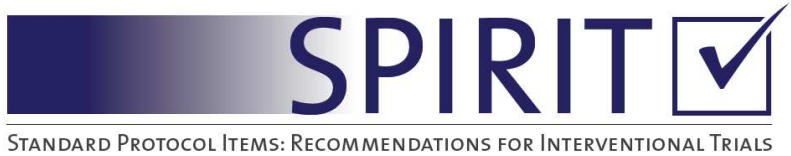

1  
2  
3  
4  
5  
6  
7  
8  
9  
10  
11  
12  
13  
14  
15  
16  
17  
18  
19  
20  
21  
22  
23  
24  
25  
26  
27  
28  
29  
30  
31  
32  
33  
34  
35  
36  
37  
38  
39  
40  
41  
42  
43  
44  
45  
46  
47

SPIRIT 2013 Checklist: Recommended items to address in a clinical trial protocol and related documents\*

| Section/item                      | Item No | Description                                                                                                                                                                                                                                                                              | Addressed on page number |
|-----------------------------------|---------|------------------------------------------------------------------------------------------------------------------------------------------------------------------------------------------------------------------------------------------------------------------------------------------|--------------------------|
| <b>Administrative information</b> |         |                                                                                                                                                                                                                                                                                          |                          |
| Title                             | 1       | Descriptive title identifying the study design, population, interventions, and, if applicable, trial acronym                                                                                                                                                                             | _____1_____              |
| Trial registration                | 2a      | Trial identifier and registry name. If not yet registered, name of intended registry                                                                                                                                                                                                     | _____2_____              |
|                                   | 2b      | All items from the World Health Organization Trial Registration Data Set                                                                                                                                                                                                                 | _____                    |
| Protocol version                  | 3       | Date and version identifier                                                                                                                                                                                                                                                              | _____1_____              |
| Funding                           | 4       | Sources and types of financial, material, and other support                                                                                                                                                                                                                              | _____15_____             |
| Roles and responsibilities        | 5a      | Names, affiliations, and roles of protocol contributors                                                                                                                                                                                                                                  | _____15_____             |
|                                   | 5b      | Name and contact information for the trial sponsor                                                                                                                                                                                                                                       | _____15_____             |
|                                   | 5c      | Role of study sponsor and funders, if any, in study design; collection, management, analysis, and interpretation of data; writing of the report; and the decision to submit the report for publication, including whether they will have ultimate authority over any of these activities | _____15_____             |
|                                   | 5d      | Composition, roles, and responsibilities of the coordinating centre, steering committee, endpoint adjudication committee, data management team, and other individuals or groups overseeing the trial, if applicable (see Item 21a for data monitoring committee)                         | _____7, 8, _____         |

## Introduction

|                          |    |                                                                                                                                                                                                           |     |
|--------------------------|----|-----------------------------------------------------------------------------------------------------------------------------------------------------------------------------------------------------------|-----|
| Background and rationale | 6a | Description of research question and justification for undertaking the trial, including summary of relevant studies (published and unpublished) examining benefits and harms for each intervention        | 4,5 |
|                          | 6b | Explanation for choice of comparators                                                                                                                                                                     |     |
| Objectives               | 7  | Specific objectives or hypotheses                                                                                                                                                                         | 5   |
| Trial design             | 8  | Description of trial design including type of trial (eg, parallel group, crossover, factorial, single group), allocation ratio, and framework (eg, superiority, equivalence, noninferiority, exploratory) | 5   |

## Methods: Participants, interventions, and outcomes

|                      |     |                                                                                                                                                                                                                                                                                                                                                                                |     |
|----------------------|-----|--------------------------------------------------------------------------------------------------------------------------------------------------------------------------------------------------------------------------------------------------------------------------------------------------------------------------------------------------------------------------------|-----|
| Study setting        | 9   | Description of study settings (eg, community clinic, academic hospital) and list of countries where data will be collected. Reference to where list of study sites can be obtained                                                                                                                                                                                             | 5   |
| Eligibility criteria | 10  | Inclusion and exclusion criteria for participants. If applicable, eligibility criteria for study centres and individuals who will perform the interventions (eg, surgeons, psychotherapists)                                                                                                                                                                                   | 5   |
| Interventions        | 11a | Interventions for each group with sufficient detail to allow replication, including how and when they will be administered                                                                                                                                                                                                                                                     | 5,6 |
|                      | 11b | Criteria for discontinuing or modifying allocated interventions for a given trial participant (eg, drug dose change in response to harms, participant request, or improving/worsening disease)                                                                                                                                                                                 | 6   |
|                      | 11c | Strategies to improve adherence to intervention protocols, and any procedures for monitoring adherence (eg, drug tablet return, laboratory tests)                                                                                                                                                                                                                              | 6   |
|                      | 11d | Relevant concomitant care and interventions that are permitted or prohibited during the trial                                                                                                                                                                                                                                                                                  |     |
| Outcomes             | 12  | Primary, secondary, and other outcomes, including the specific measurement variable (eg, systolic blood pressure), analysis metric (eg, change from baseline, final value, time to event), method of aggregation (eg, median, proportion), and time point for each outcome. Explanation of the clinical relevance of chosen efficacy and harm outcomes is strongly recommended | 6   |
| Participant timeline | 13  | Time schedule of enrolment, interventions (including any run-ins and washouts), assessments, and visits for participants. A schematic diagram is highly recommended (see Figure)                                                                                                                                                                                               | 6   |

1  
2  
3 Sample size 14 Estimated number of participants needed to achieve study objectives and how it was determined, including 7  
4 clinical and statistical assumptions supporting any sample size calculations

5  
6 Recruitment 15 Strategies for achieving adequate participant enrolment to reach target sample size 8  
7

8 **Methods: Assignment of interventions (for controlled trials)**  
9

10 Allocation:

11 Sequence generation 16a Method of generating the allocation sequence (eg, computer-generated random numbers), and list of any 7  
12 factors for stratification. To reduce predictability of a random sequence, details of any planned restriction  
13 (eg, blocking) should be provided in a separate document that is unavailable to those who enrol participants  
14 or assign interventions  
15

16  
17 Allocation concealment mechanism 16b Mechanism of implementing the allocation sequence (eg, central telephone; sequentially numbered, 7  
18 opaque, sealed envelopes), describing any steps to conceal the sequence until interventions are assigned  
19  
20

21 Implementation 16c Who will generate the allocation sequence, who will enrol participants, and who will assign participants to 7  
22 interventions  
23

24 Blinding (masking) 17a Who will be blinded after assignment to interventions (eg, trial participants, care providers, outcome 7  
25 assessors, data analysts), and how  
26

27 17b If blinded, circumstances under which unblinding is permissible, and procedure for revealing a participant's 7  
28 allocated intervention during the trial  
29  
30

31 **Methods: Data collection, management, and analysis**  
32

33 Data collection methods 18a Plans for assessment and collection of outcome, baseline, and other trial data, including any related 7,8  
34 processes to promote data quality (eg, duplicate measurements, training of assessors) and a description of  
35 study instruments (eg, questionnaires, laboratory tests) along with their reliability and validity, if known.  
36 Reference to where data collection forms can be found, if not in the protocol  
37

38 18b Plans to promote participant retention and complete follow-up, including list of any outcome data to be 7,8  
39 collected for participants who discontinue or deviate from intervention protocols  
40  
41  
42  
43  
44

|    |                                 |     |                                                                                                                                                                                                                                                                                                                                       |               |
|----|---------------------------------|-----|---------------------------------------------------------------------------------------------------------------------------------------------------------------------------------------------------------------------------------------------------------------------------------------------------------------------------------------|---------------|
| 1  |                                 |     |                                                                                                                                                                                                                                                                                                                                       |               |
| 2  |                                 |     |                                                                                                                                                                                                                                                                                                                                       |               |
| 3  | Data management                 | 19  | Plans for data entry, coding, security, and storage, including any related processes to promote data quality (eg, double data entry; range checks for data values). Reference to where details of data management procedures can be found, if not in the protocol                                                                     | ___8___       |
| 4  |                                 |     |                                                                                                                                                                                                                                                                                                                                       |               |
| 5  |                                 |     |                                                                                                                                                                                                                                                                                                                                       |               |
| 6  |                                 |     |                                                                                                                                                                                                                                                                                                                                       |               |
| 7  | Statistical methods             | 20a | Statistical methods for analysing primary and secondary outcomes. Reference to where other details of the statistical analysis plan can be found, if not in the protocol                                                                                                                                                              | ___7___       |
| 8  |                                 |     |                                                                                                                                                                                                                                                                                                                                       |               |
| 9  |                                 |     |                                                                                                                                                                                                                                                                                                                                       |               |
| 10 |                                 | 20b | Methods for any additional analyses (eg, subgroup and adjusted analyses)                                                                                                                                                                                                                                                              | ___7___       |
| 11 |                                 |     |                                                                                                                                                                                                                                                                                                                                       |               |
| 12 |                                 | 20c | Definition of analysis population relating to protocol non-adherence (eg, as randomised analysis), and any statistical methods to handle missing data (eg, multiple imputation)                                                                                                                                                       | ___7___       |
| 13 |                                 |     |                                                                                                                                                                                                                                                                                                                                       |               |
| 14 |                                 |     |                                                                                                                                                                                                                                                                                                                                       |               |
| 15 | <b>Methods: Monitoring</b>      |     |                                                                                                                                                                                                                                                                                                                                       |               |
| 16 |                                 |     |                                                                                                                                                                                                                                                                                                                                       |               |
| 17 | Data monitoring                 | 21a | Composition of data monitoring committee (DMC); summary of its role and reporting structure; statement of whether it is independent from the sponsor and competing interests; and reference to where further details about its charter can be found, if not in the protocol. Alternatively, an explanation of why a DMC is not needed | ___8, 9___    |
| 18 |                                 |     |                                                                                                                                                                                                                                                                                                                                       |               |
| 19 |                                 |     |                                                                                                                                                                                                                                                                                                                                       |               |
| 20 |                                 |     |                                                                                                                                                                                                                                                                                                                                       |               |
| 21 |                                 |     |                                                                                                                                                                                                                                                                                                                                       |               |
| 22 |                                 | 21b | Description of any interim analyses and stopping guidelines, including who will have access to these interim results and make the final decision to terminate the trial                                                                                                                                                               | ___7,9___     |
| 23 |                                 |     |                                                                                                                                                                                                                                                                                                                                       |               |
| 24 |                                 |     |                                                                                                                                                                                                                                                                                                                                       |               |
| 25 | Harms                           | 22  | Plans for collecting, assessing, reporting, and managing solicited and spontaneously reported adverse events and other unintended effects of trial interventions or trial conduct                                                                                                                                                     | ___6, 8, 9___ |
| 26 |                                 |     |                                                                                                                                                                                                                                                                                                                                       |               |
| 27 |                                 |     |                                                                                                                                                                                                                                                                                                                                       |               |
| 28 | Auditing                        | 23  | Frequency and procedures for auditing trial conduct, if any, and whether the process will be independent from investigators and the sponsor                                                                                                                                                                                           | _____         |
| 29 |                                 |     |                                                                                                                                                                                                                                                                                                                                       |               |
| 30 |                                 |     |                                                                                                                                                                                                                                                                                                                                       |               |
| 31 |                                 |     |                                                                                                                                                                                                                                                                                                                                       |               |
| 32 | <b>Ethics and dissemination</b> |     |                                                                                                                                                                                                                                                                                                                                       |               |
| 33 |                                 |     |                                                                                                                                                                                                                                                                                                                                       |               |
| 34 | Research ethics approval        | 24  | Plans for seeking research ethics committee/institutional review board (REC/IRB) approval                                                                                                                                                                                                                                             | ___9___       |
| 35 |                                 |     |                                                                                                                                                                                                                                                                                                                                       |               |
| 36 |                                 |     |                                                                                                                                                                                                                                                                                                                                       |               |
| 37 | Protocol amendments             | 25  | Plans for communicating important protocol modifications (eg, changes to eligibility criteria, outcomes, analyses) to relevant parties (eg, investigators, REC/IRBs, trial participants, trial registries, journals, regulators)                                                                                                      | _____         |
| 38 |                                 |     |                                                                                                                                                                                                                                                                                                                                       |               |
| 39 |                                 |     |                                                                                                                                                                                                                                                                                                                                       |               |
| 40 |                                 |     |                                                                                                                                                                                                                                                                                                                                       |               |
| 41 |                                 |     |                                                                                                                                                                                                                                                                                                                                       |               |
| 42 |                                 |     |                                                                                                                                                                                                                                                                                                                                       |               |
| 43 |                                 |     |                                                                                                                                                                                                                                                                                                                                       |               |
| 44 |                                 |     |                                                                                                                                                                                                                                                                                                                                       |               |
| 45 |                                 |     |                                                                                                                                                                                                                                                                                                                                       |               |
| 46 |                                 |     |                                                                                                                                                                                                                                                                                                                                       |               |
| 47 |                                 |     |                                                                                                                                                                                                                                                                                                                                       |               |

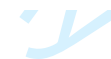

1  
2  
3  
4  
5  
6  
7  
8  
9  
10  
11  
12  
13  
14  
15  
16  
17  
18  
19  
20  
21  
22  
23  
24  
25  
26  
27  
28  
29  
30  
31  
32  
33  
34  
35  
36  
37  
38  
39  
40  
41  
42  
43  
44  
45  
46  
47

|                               |     |                                                                                                                                                                                                                                                                                     |     |
|-------------------------------|-----|-------------------------------------------------------------------------------------------------------------------------------------------------------------------------------------------------------------------------------------------------------------------------------------|-----|
| Consent or assent             | 26a | Who will obtain informed consent or assent from potential trial participants or authorised surrogates, and how (see Item 32)                                                                                                                                                        | 7,8 |
|                               | 26b | Additional consent provisions for collection and use of participant data and biological specimens in ancillary studies, if applicable                                                                                                                                               |     |
| Confidentiality               | 27  | How personal information about potential and enrolled participants will be collected, shared, and maintained in order to protect confidentiality before, during, and after the trial                                                                                                |     |
| Declaration of interests      | 28  | Financial and other competing interests for principal investigators for the overall trial and each study site                                                                                                                                                                       | 15  |
| Access to data                | 29  | Statement of who will have access to the final trial dataset, and disclosure of contractual agreements that limit such access for investigators                                                                                                                                     | 8   |
| Ancillary and post-trial care | 30  | Provisions, if any, for ancillary and post-trial care, and for compensation to those who suffer harm from trial participation                                                                                                                                                       |     |
| Dissemination policy          | 31a | Plans for investigators and sponsor to communicate trial results to participants, healthcare professionals, the public, and other relevant groups (eg, via publication, reporting in results databases, or other data sharing arrangements), including any publication restrictions | 8   |
|                               | 31b | Authorship eligibility guidelines and any intended use of professional writers                                                                                                                                                                                                      | 8   |
|                               | 31c | Plans, if any, for granting public access to the full protocol, participant-level dataset, and statistical code                                                                                                                                                                     |     |
| <b>Appendices</b>             |     |                                                                                                                                                                                                                                                                                     |     |
| Informed consent materials    | 32  | Model consent form and other related documentation given to participants and authorised surrogates                                                                                                                                                                                  |     |
| Biological specimens          | 33  | Plans for collection, laboratory evaluation, and storage of biological specimens for genetic or molecular analysis in the current trial and for future use in ancillary studies, if applicable                                                                                      | 10  |

---

\*It is strongly recommended that this checklist be read in conjunction with the SPIRIT 2013 Explanation & Elaboration for important clarification on the items. Amendments to the protocol should be tracked and dated. The SPIRIT checklist is copyrighted by the SPIRIT Group under the Creative Commons "[Attribution-NonCommercial-NoDerivs 3.0 Unported](https://creativecommons.org/licenses/by-nc-nd/3.0/)" license.



# BMJ Open

## The effects of Menaquinone-7 supplementation in patients with aortic valves calcification: study protocol for a randomized controlled trial

|                                 |                                                                                                                                                                                                                                                                                                                                                                                                                                                                                                                                                                                                                                                                                                                                                                                                                                                                                                                                                                                                                                                                                                                                                                                                                                                                                                                                                                                                                                                                                                                            |
|---------------------------------|----------------------------------------------------------------------------------------------------------------------------------------------------------------------------------------------------------------------------------------------------------------------------------------------------------------------------------------------------------------------------------------------------------------------------------------------------------------------------------------------------------------------------------------------------------------------------------------------------------------------------------------------------------------------------------------------------------------------------------------------------------------------------------------------------------------------------------------------------------------------------------------------------------------------------------------------------------------------------------------------------------------------------------------------------------------------------------------------------------------------------------------------------------------------------------------------------------------------------------------------------------------------------------------------------------------------------------------------------------------------------------------------------------------------------------------------------------------------------------------------------------------------------|
| Journal:                        | <i>BMJ Open</i>                                                                                                                                                                                                                                                                                                                                                                                                                                                                                                                                                                                                                                                                                                                                                                                                                                                                                                                                                                                                                                                                                                                                                                                                                                                                                                                                                                                                                                                                                                            |
| Manuscript ID                   | bmjopen-2018-022019.R2                                                                                                                                                                                                                                                                                                                                                                                                                                                                                                                                                                                                                                                                                                                                                                                                                                                                                                                                                                                                                                                                                                                                                                                                                                                                                                                                                                                                                                                                                                     |
| Article Type:                   | Protocol                                                                                                                                                                                                                                                                                                                                                                                                                                                                                                                                                                                                                                                                                                                                                                                                                                                                                                                                                                                                                                                                                                                                                                                                                                                                                                                                                                                                                                                                                                                   |
| Date Submitted by the Author:   | 20-Jun-2018                                                                                                                                                                                                                                                                                                                                                                                                                                                                                                                                                                                                                                                                                                                                                                                                                                                                                                                                                                                                                                                                                                                                                                                                                                                                                                                                                                                                                                                                                                                |
| Complete List of Authors:       | Lindholt, Jes; Odense Universitetshospital, Department of Cardiothoracic and Vascular Surgery; Odense Universitetshospital, Centre for Individualized Medicine in Arterial Diseases<br>Frandsen, Niels Erik<br>Fredgart, Maise; Odense Universitetshospital, Department of Cardiology<br>Øvrehus, Kristian; Odense Universitetshospital, Department of Cardiothoracic and Vascular Surgery<br>Dahl, Jordi; Odense Universitetshospital, Department of Cardiology<br>Møller, Jacob; Odense Universitetshospital, Department of Cardiology<br>Folkestad, Lars; Odense Universitetshospital, Department of Endocrinology<br>Urbonaviciene, Grazina; Regionshospitalet Silkeborg<br>Becker, Søren; Regionshospitalet Silkeborg<br>Lambrechtsen, Jess; Svendborg Sygehus, Department of Cardiology<br>Auscher, Søren; Svendborg Sygehus, Department of Cardiology<br>Hosbond, Susanne; Sygehus Lillebalt Vejle Sygehus, Department of Cardiology<br>Alan , Dilek; Sygehus Lillebalt Vejle Sygehus, Department of Cardiology<br>Rasmussen, Lars; Odense Universitetshospital, Department of Clinical Biochemistry and Pharmacology; Odense Universitetshospital, Centre for Individualized Medicine in Arterial Diseases<br>Gerke, Oke; Odense Universitetshospital, Department of Nuclear Medicine<br>Mickley, Hans; Odense Universitetshospital, Cardiology<br>Diederichsen, Axel; Odense Universitetshospital, Department of Cardiology; Odense Universitetshospital, Centre for Individualized Medicine in Arterial Diseases |
| <b>Primary Subject Heading</b>: | Cardiovascular medicine                                                                                                                                                                                                                                                                                                                                                                                                                                                                                                                                                                                                                                                                                                                                                                                                                                                                                                                                                                                                                                                                                                                                                                                                                                                                                                                                                                                                                                                                                                    |
| Secondary Subject Heading:      | Pharmacology and therapeutics, Radiology and imaging, Diabetes and endocrinology                                                                                                                                                                                                                                                                                                                                                                                                                                                                                                                                                                                                                                                                                                                                                                                                                                                                                                                                                                                                                                                                                                                                                                                                                                                                                                                                                                                                                                           |
| Keywords:                       | menaquinone-7, aortic valve calcification, Valvular heart disease < CARDIOLOGY, Calcium & bone < DIABETES & ENDOCRINOLOGY, Cardiovascular imaging < RADIOLOGY & IMAGING, randomized clinical trial                                                                                                                                                                                                                                                                                                                                                                                                                                                                                                                                                                                                                                                                                                                                                                                                                                                                                                                                                                                                                                                                                                                                                                                                                                                                                                                         |
|                                 |                                                                                                                                                                                                                                                                                                                                                                                                                                                                                                                                                                                                                                                                                                                                                                                                                                                                                                                                                                                                                                                                                                                                                                                                                                                                                                                                                                                                                                                                                                                            |

1  
2  
3  
4  
5  
6  
7  
8  
9  
10  
11  
12  
13  
14  
15  
16  
17  
18  
19  
20  
21  
22  
23  
24  
25  
26  
27  
28  
29  
30  
31  
32  
33  
34  
35  
36  
37  
38  
39  
40  
41  
42  
43  
44  
45  
46  
47  
48  
49  
50  
51  
52  
53  
54  
55  
56  
57  
58  
59  
60

SCHOLARONE™  
Manuscripts

For peer review only

# The effects of Menaquinone-7 supplementation in patients with aortic valves calcification: study protocol for a randomized controlled trial

## Acronym: The Aortic Valve DECalcification (AVADEC) trial

Authors: Jes Lindholt,<sup>1,2</sup> Niels Erik Frandsen,<sup>3</sup> Maise Høigaard Fredgart,<sup>4</sup> Kristian Øvrehus,<sup>4</sup> Jordi Sanchez Dahl,<sup>4</sup> Jacob Møller,<sup>4</sup> Lars Folkestad,<sup>5</sup> Grazina Urbonaviciene,<sup>6</sup> Søren Warberg Becker,<sup>6</sup> Jess Lambrechtsen,<sup>7</sup> Søren Auscher,<sup>7</sup> Susanne Hosbond,<sup>8</sup> Dilek Hunerel Alan,<sup>8</sup> Lars Melholt Rasmussen,<sup>2,9</sup> Oke Gerke,<sup>10</sup> Hans Mickley<sup>4</sup> and Axel Diederichsen<sup>2,4</sup>

<sup>1</sup> Department of Cardiothoracic and Vascular Surgery, Odense University Hospital, DENMARK

<sup>2</sup> Centre for Individualized Medicine in Arterial Diseases, DENMARK

<sup>3</sup> Kirkestenten 16, Skt Klemens, 5260 Odense S

<sup>4</sup> Department of Cardiology, Odense University Hospital, DENMARK

<sup>5</sup> Department of Endocrinology, Odense University Hospital, DENMARK

<sup>6</sup> Department of Cardiology, Silkeborg Hospital, DENMARK

<sup>7</sup> Department of Cardiology, Svendborg Hospital, DENMARK

<sup>8</sup> Department of Cardiology, Vejle Hospital, DENMARK

<sup>9</sup> Department of Department of Clinical Biochemistry and Pharmacology, Odense University Hospital, DENMARK

<sup>10</sup> Department of Nuclear Medicine, Odense University Hospital, DENMARK.

Corresponding author:

Axel Cosmus Pyndt Diederichsen

Department of Cardiology, Odense University Hospital, DENMARK

Postal address: J. B. Winsløvs Vej 4, 5000 Odense, DENMARK

Telephone number: +45 40191227

Mail: [axel.diederichsen@rsyd.dk](mailto:axel.diederichsen@rsyd.dk)

Word count (main text): 3559

Key words: menaquinone-7, aortic valve calcification, double-blind, randomized, placebo-controlled study

## 1. Abstract

### Introduction

Aortic stenosis is a common heart valve disease and due to the growing elderly population the prevalence is increasing. The disease is progressive with increasing calcification of the valve cusps. A few attempts with medical preventive treatment have failed, thus presently the only effective treatment of aortic stenosis is surgery. This study will examine the effect of menaquinone-7 (MK-7) supplementation on progression of aortic valve calcification (AVC). We hypothesize that MK-7 supplementation will slow down the calcification process.

### Method and analysis

In this multicenter and double-blinded placebo-controlled study, 400 men aged 65-74 years with substantial AVC are randomized (1:1) to treatment with MK-7 (720 µg/day) supplemented by the recommended daily dose of vitamin D (25 µg/day) or placebo treatment (no active treatment) for two years. Exclusion criteria are treatment with vitamin K antagonist or coagulation disorders. To evaluate AVC score, a non-contrast CT-scan is performed at baseline and repeated after 12 and 24 months of follow-up. Primary outcome is difference in AVC score from baseline to follow-up at two years. Intention-to-treat principle is used for all analyses.

### Ethics and dissemination

There are no reported adverse effects associated with the use of MK-7. The protocol is approved by the Regional Scientific Ethical Committee for Southern Denmark (S-20170059) and the Data Protection Agency (17/19010). It is conducted in accordance with the Declaration of Helsinki. Positive as well as negative findings will be reported.

### Trial registration number

ClinicalTrials.gov Identifier: NCT03243890.

### Strengths and limitations of this study

- The study is the first to investigate the effect of menaquinone-7 supplementation on progression of aortic valve calcification.
- Strengths include the stratified randomization, double-blind placebo-controlled design and being a multi-center trial.
- A clinical relevant dose of Menaquinone-7 supplementation is unknown, and accordingly the chosen dose might be insufficient.
- A confirmatory trial with clinical outcomes is needed, if progression of aortic valve calcification is decreased by menaquinone-7 supplementation.

For peer review only

## 2. Introduction

In the ongoing Danish Cardiovascular Screening (DANCAVAS) trial, we are randomizing (1:2) 45,000 Danish men aged 65-74 years to a screening examination comprising a non-contrast CT scan.<sup>1</sup> The purpose is to investigate whether an advanced cardiovascular screening will prevent death and cardiovascular events. In a supplementary PhD study, we have been studying aortic valve calcification (AVC). With prevalence ranging from 2 to 7%, aortic valve stenosis is the most common heart valve disease in the western world,<sup>2,3</sup> and combined with the rapidly growing elderly population it is likely that the prevalence will increase further in the future. Central in the pathogenesis is pro-osteogenic factors entailing active bone formation in the valve cusps and this drive disease progression.<sup>4,5</sup> To halt aortic stenosis progression preventive medical treatments with statins and bisphosphonates have been explored in randomized clinical trials, but with discouraging results. Thus at present medical treatment is not an option.<sup>6</sup>

In DANCAVAS, we have made an interesting observation. Patients on vitamin K antagonist (VKA) treatment had a significant increased AVC score (median 32 versus 11,  $p=0.004$ ). Adjusting for age, smoking, hypertension and cardiovascular disease, this was confirmed in binominal negative (IRR 1.70, 95% CI: 1.25-2.31) and logistic regression (OR 1.66, 95% CI 1.19-2.30) (Axel Diederichsen, DANCAVAS). Thus, in DANCAVAS, patients on VKA seem to have increased aortic valve calcifications.

### Vitamin K and the calcification process

Calcification is a slowly progressive process and caused by an imbalance between the mechanisms that promotes and inhibits the deposition of calcium in the vascular wall, and the vitamin K-dependent proteins play an essential role in this inhibition. The most familiar of the K vitamins are phyloquinone (VK1), as this is essential in activation of several coagulation factors, but menaquinone (MK) is another very important vitamin K species. MK is deemed necessary for  $\gamma$ -carboxylation of proteins involved inhibition of arterial calcification, i.e. matrix-Gla proteins (MGP).<sup>7-10</sup> Without these activated proteins, the balance of cellular calcium uptake and the mineralization process in bone and blood vessels is impaired. Additionally, clinical studies suggest that MK preserves bone structure.<sup>11</sup>

The inhibiting process of the vitamin K-dependent proteins was originally showed by Luo et al. in 1997.<sup>12</sup> In a mice model they described MGP to be an important inhibitor of calcification of arteries. In other animal studies, the inhibition of the vitamin K-dependent proteins by VKA resulted in arterial and soft tissue calcification.<sup>13-16</sup> These observations are in agreement with our findings from the DANCAVAS trial, and other human studies have also shown that long-term use of VKA is associated with both increased coronary- and extra-coronary vascular calcification.<sup>17-20</sup> Furthermore, in Japanese, the use of VKA was associated to exacerbate the risk of degenerative aortic valve disease.<sup>21</sup> Finally, low circulating MGP and an impaired carboxylation at its tissue site of expression is associated with the development and progression of cardiovascular disease.<sup>22</sup>

Since VKA seems to induce vascular calcification, MK intake may be beneficial to reduce these calcifications. No recommendations of MK are available; however, we know that the daily intake in

the Western world is not sufficient to meet the request for a complete activation of MGP. Observational studies in healthy elderly have shown an inverse relationship between MK-4 intake and coronary artery calcification (CAC),<sup>23</sup> and VK1 did slow the progression of CAC after 3 years of follow-up.<sup>24</sup> Furthermore, VK1 and MK-7 decreased arterial stiffness and improved elastic properties of the carotid artery.<sup>25;26</sup> Dalmeijer et al. performed a randomized, double blind, placebo controlled trial to investigate the effect of MK-7 supplementation (180 µg/day, 360 µg/day or placebo) and found a dose-dependent decrease of uncarboxylated MGP concentrations.<sup>27</sup> Two subsequent studies in haemodialysis patients found an almost linear dose–response decrease of uncarboxylated MGP without an upper limit, with doses ranging between 360 µg/day and 1080 µg trice weekly.<sup>28;29</sup> In a supplementary study, MK-7 was well tolerated and did not cause a hypercoagulable state.<sup>30</sup> Finally, there is no documented toxicity for VK1 or MK-4, and MK-7, and the WHO has set no upper tolerance level for vitamin K intake.<sup>31</sup>

## 2.1. Hypothesis

In a randomized setup we test the hypothesis that supplementation with MK-7 (720 µg per day) and vitamin D (25 µg/day) in comparison to placebo will half the progression of further aortic valve calcification in patients with substantial valve calcification, but without aortic valve stenosis.

## 3. Methods

### 3.1. Trial design

The study is a double-blind, randomized, placebo-controlled study.

### 3.2. Participants

In DANCAVAS we are performing echocardiography in all participants with an AVC score above the 90% percentile (AVC score above 300).<sup>32</sup> Patients with an AVC score above 300, but without aortic valve stenosis are eligible patients in AVADEC.

Exclusion criteria are:

- Prior heart valve surgery
- Known significant aortic valve disease (peak velocity  $\geq 3.0$  m/s)
- History of venous thrombosis including pulmonary embolism
- Coagulation disorders
- VKA use
- Disorders of calcium and phosphate metabolism
- A life-expectancy < 5 years

The study takes place at Odense University Hospital, and the hospitals in Svendborg, Vejle and Silkeborg, Denmark, from 2018 to 2020.

### 3.3. Intervention

In AVADEC, half of the patients are randomized to supplementation with MK-7 (720 µg/day) including the recommended daily dose of vitamin D (25 µg/day) and the other half to placebo

1  
2  
3  
4 treatment (no active treatment). Treatment of both groups will last for at least 24 months. During  
5 this time participants will visit our research unit five times, at 6-month intervals (Figure 1). To  
6 evaluate AVC score, we will perform a non-contrast CT-scan at baseline and after 12 and 24  
7 months of follow-up.  
8

### 9 10 **3.4. Outcome**

11 The *primary endpoint* is the change in AVC score from baseline to two years. The natural history of  
12 the aortic valve calcification is not adequately understood, and accordingly the changes are  
13 analyzed in two pre-specified patient subgroups (AVC score 300-599 and  $\geq 600$ , respectively).  
14

15 *Secondary endpoints* are:

- 16 • Change in calcifications in the coronaries, carotid, aortic, renal, iliac and femoral arteries by  
17 non-contrast CT.
- 18 • Change in coronary and carotid plaque composition by contrast CT
- 19 • Change in aortic valve area by transthoracic echocardiography.
- 20 • Change in bone density as quantitative CT of the columna lumbalis and hip region.
- 21 • Change in MGP and osteocalcin with different phosphorylation (p and dp) and carboxylation  
22 forms (c and uc).
- 23 • Quality of life.

24  
25  
26  
27  
28 *Safety endpoints* are:

- 29 • Death
- 30 • Cardiovascular events (myocardial infarction, coronary revascularization, stroke, heart valve  
31 surgery, significant aortic disease (including dissection, ruptur and surgery) and significant  
32 peripheral artery disease (including thromboembolisms and surgery))
- 33 • Progressive aortic valve disease (more than 50% increase in AVC score)
- 34 • Venous thromboembolism including pulmonary embolism
- 35 • Bleeding (including intracranial bleeding and hemorrhage associated with a drop in hemoglobin  
36 of  $\geq 2$ mmol/l)
- 37 • Low-energy or spontaneous fracture
- 38 • Cancer, including solid and hematologic
- 39 • Significant deterioration in laboratory measurements (calcium, magnesium, albumin, phosphate,  
40 alkaline phosphatase, bone specific alkaline phosphatase, Parathyroid Hormone, vitamin D or  
41 Prothrombin time-International normalized ratio (PT-INR)).

### 42 43 44 45 46 **3.5 Sample size**

47 We are planning a study of a continuous response variable from independent control and  
48 experimental subjects with 1 control per experimental subject. The mean annual AVC progression  
49 is unknown, but based on data from 37 subjects of the DANCAVAS study we estimate the  
50 progression to be 100 units in two years with a joint standard deviation 67 units. We expect that the  
51 treatment will reduce the AVC progression by 20% (i.e. to 80), leading to the inclusion of 177  
52 experimental subjects and 177 control subjects to be able to reject the null hypothesis that the  
53  
54  
55  
56  
57  
58



1  
2  
3  
4 population means of the experimental and control groups are equal with probability (power) 0.8.  
5 The Type I error probability associated with this test of this null hypothesis is 0.05. Accordingly,  
6 354 subjects are needed, but in order to account for drop-out 400 patients will be included.  
7 Interim analysis: The sample size is based on two years of treatment. One member of the The data  
8 and safety monitoring board (HM) and a statistician (OG) will evaluate the available primary  
9 endpoint one-year data of approximately 100 patients around 01 July 2019 in order to assess  
10 whether the treatment period should be prolonged by six months. The number of patients to be  
11 included in this study is unaffected by the decision to prolong treatment by six months or not.  
12  
13

### 14 **3.6 Stratified randomization**

15  
16 Subjects will be randomized 1:1 after stratification for site (Odense University Hospital, Svendborg  
17 Hospital, Vejle Hospital or Silkeborg Hospital), and AVC score (300-599 or  $\geq 600$ ). Each site will  
18 be provided with sequentially numbered, opaque and sealed envelopes containing randomly  
19 generated treatment allocations. Two types of envelopes are provided; 1) AVC 300-599; and 2)  
20 AVC  $\geq 600$ .  
21  
22

### 23 **3.7 Blinding**

24 The randomization-list is available to the data and safety monitoring board, but patients, nurses,  
25 physicians and other data collectors are kept blinded to the allocation during the study. The placebo  
26 is matched to the study drug for taste, color, and size.  
27  
28

### 29 **3.8 Statistical methods**

30 We will use the intention-to-treat principle for all analyses. The primary endpoint (change in AVC  
31 score) will be presented as continuous variable. Additionally, the changes are analyzed in two pre-  
32 specified patient subgroups (AVC score 300-599 and  $\geq 600$ , respectively). Primary hypothesis  
33 testing will be done hierarchically to maintain a closed testing procedure: only if the overall  
34 treatment effect is statistically significant, testing in AVC strata will be performed with  
35 confirmatory intent, otherwise solely for explorative reasons. Secondary endpoints include 1)  
36 change in calcifications in the coronaries, carotid, aortic, renal, iliac and femoral arteries; 2) change  
37 in coronary and carotid plaque composition by contrast CT; 3) change in aortic valve area by  
38 transthoracic echocardiography and 4) change in bone-density, -geometry and -microstructure as  
39 quantitative CT of the columna lumbalis and hip region.  
40  
41

42 We use general linear models (employing group, time point, and group x time point interaction) for  
43 the primary and for secondary endpoints as well as potential harms. Missing data will be treated as  
44 such; supplementary sensitivity analyses making use of imputed values under the missing at random  
45 assumption will be conducted for the primary analysis if more than 5% of expected data points will  
46 be missing.  
47  
48

### 49 **3.9. Patient and Public Involvement**

50  
51 Patients and public were not involved in the design of study, but as members of the Regional  
52 Scientific Ethical Committee for Southern Denmark the public have approved the written  
53 participant information.  
54  
55

#### 4. Organization

The study is a part of the DANCAVAS trial, and conducted in collaboration with Centre for Individualized Medicine in Arterial Diseases (CIMA). The DANCAVAS secretariat at OUH will identify eligible patients in the DANCAVAS database, and an invitation is send by mail to these patients. If a patient is interested, he is invited to the local site to discuss the trial with a study nurse. If he is willing to participate in the study, informed consent is obtained, and he is randomly assigned to the MK-7 or placebo group. Nurses, radiographers, biomedical technicians and a PhD student are responsible for the treatment and examinations. During the study, only the independent data and safety monitoring board will have access to the complete database including the randomization-list. The data registration is performed via REDCap (Research Electronic Data Capture) with logging and secure storage directly on a server under Odense Patient data Explorative Network (OPEN), Region of Southern Denmark.

*The Executive Committee*, consisting Professor Jes Lindholt (JL, Department of Cardiothoracic and Vascular Surgery, OUH), MD Niels Erik Frandsen (NEF) and associate professor Axel Diederichsen (AD, Department of Cardiology, OUH) conceived and designed the study, and will handle the decisions regarding the overall organization including administration, budget and use of the database.

*The Steering Committee* will consist of the members of the executive committee, and Jordi Dahl (JD, Department of Cardiology, OUH), Professor Lars Melholt Rasmussen (LMR, Department of Clinical Biochemistry and Pharmacology) both OUH, and two from each screening site. All practical issues concerning the treatment and data sampling will be handled by the steering committee.

*The data and safety monitoring board (DSMB)* consists of the following experts: Professor of Cardiology Hans Mickley (HM, OUH), Professor of Cardiology and Clinical Epidemiology Christian Torp-Pedersen (Aalborg University) and Professor of Cardiology Lars Køber (Rigshospitalet), who all have large have experience with clinical randomized trials.

#### 5. Publication

Project results reporting the primary endpoint will be published in peer reviewed international journals. The order of the authors will be PhD student (to be appointed), JL, JD, LF, two from each screening site, LMR, NEF and AD. Positive as well as negative findings will be reported.

#### 6. Feasibility

By December 2017 more than 10000 participants have been included in DANCAVAS, and 800 of these are eligible to participate in AVADEC. Thus we are able to identify enough participants. AD and JL are PI's of the main study, DANCAVAS. In addition, several experts assist with AVADEC: JD is an expert in aortic stenosis, LMR is an expert in biochemistry, while PhD Lars Folkestad (LF) has undertaken several studies in bone-density, -geometry and -microstructure. In addition, local cardiologist from Vejle, Svendborg and Silkeborg will be responsible for securing local practical feasibility of the project at the specific screening sites.

## 7. Safety and Ethics

Pure natural MK-7 is used in the study. A daily dose at 720 µg MK-7 has not been examined on patients with aortic stenosis, but in a Belgian dose-finding study using 360, 720 or 1080 µg of MK-7 thrice weekly for 8 weeks in chronic haemodialysis patients no severe adverse effects were observed.<sup>29</sup> Presently the Belgian group are performing a randomized trial exploring the efficacy of 2000 µg MK-7 thrice weekly.<sup>33</sup> MK-7 is well tolerated and does not cause a hypercoagulable state.<sup>30</sup> There are no reported adverse effects associated with the use of MK-7.<sup>31</sup>

Each patient has three CT scans during the study. Epidemiological studies do suggest that radiation exposure is associated with a slightly increased risk of cancer. The best studied cohort is the Japanese atomic bomb survivor cohort. In a group exposed to a mean radiation dose of 29 mSv, an excess of solid cancers – corresponding to an excess relative risk of 2% – were observed.<sup>34</sup> No large studies involving medically exposed adult cohorts are available, but a linear no-threshold model has been considered. Thus, there may be no minimal radiation dose for an increased cancer risk, and the risk increases linearly with the radiation dose. The average dose of one non-contrast CT scan is 3 mSv. Two additionally contrast CT scans are performed (baseline and 24 months) with an average dose of 3 mSv each, thus at average the participants in AVADEC will receive 15 mSv. For comparison, the annual background radiation dose in Denmark is 3 mSv, and the average annual limit for radiation workers is 20 mSv.<sup>35</sup>

An independent DSMB is established to perform ongoing safety surveillance. None of the DSMB-members are directly or indirectly involved in the coordination, execution or analysis of the study. The following is assessed: 1) death, myocardial infarction, coronary revascularization, stroke, heart valve surgery and venous thromboembolism, 2) progressive aortic valve disease, and 3) laboratory measurements (Calcium, Magnesium, Albumin, Phosphate and alkaline phosphatase, bone specific alkaline phosphatase, Parathyroid Hormone and vitamin D or Prothrombin time-International normalized ratio (PT-INR)). If there is a reason for concern, the DSMB can advise to interrupt the study for further analysis, and the study can be terminated prematurely if the number of severe adverse events is significantly higher in the treatment group versus the placebo group. This will be discussed in a meeting with the investigators and DSMB. The investigator will inform the subjects in case of interruption or termination of the study.

Subjects can leave the study at any time for any reason if they wish to do so, without any consequences. The investigator can decide to withdraw a subject from the study for urgent medical reasons or in case of demonstrable poor adherence to the study medication. This is assessed by interview and pill-count. If subjects are required to take VKA during the course of the study they will be withdrawn.

The protocol is approved by the Regional Scientific Ethical Committee for Southern Denmark (S-20170059) and the Data Protection Agency (17/19010). It is conducted in accordance with the Declaration of Helsinki. According to Danish legislation vitamin K is a dietary supplement, and accordingly license from the Danish Medicines Agency is not needed. Written informed consent is obtained from each participant. The study is registered at [clinicaltrials.gov](http://clinicaltrials.gov): NCT03243890.

## 8. Discussion

Aortic stenosis is a common heart valve disease and due to the growing elderly population the prevalence is increasing. The disease is progressive with increasing calcification of the valve cusps. A few attempts with medical preventive treatment have failed, thus presently the only effective treatment of aortic stenosis is surgery. This study will examine the effect of MK-7 supplementation on progression of AVC in a randomized, placebo-controlled study. We hypothesize that MK-7 supplementation will slow down the progression of valves calcification. If positive effects are shown a new treatment options may be available to prevent progression of aortic valve calcification. The result of this study will be expected in 2021.

## 9. Applied tests during the study

### 9.1. Medical interview

At baseline, all relevant data are supplied from the DANCAVAS trial (e.g. AVC score, medical history and lifestyle factors).<sup>1</sup> At every visit, an interview is conducted and evaluating the following: incident cardiovascular disease, dyspnea, chest pain and quality of life (EurQoL 5D).

### 9.2. Laboratory Assessment

Blood samples are obtained at every visit. Routine parameters include:

- Circulating MGP species with different phosphorylation (p and dp) and carboxylation forms (c and uc) are measured using a sandwich enzyme-linked immunosorbent assay (ELISA) based on monoclonal antibodies.
- Creatinine (eGFR), Natrium, Potassium, Calcium, Magnesium, Albumin, Phosphate, alkaline phosphatase, bone specific alkaline phosphatase, Parathyroid Hormone, Vitamin D and INR.

As a part of the study, a biobank at baseline and after 24 months will be organized. 40 mL of blood form each of the participants are centrifuged, labeled, and stored at -80°C until serial testing.

### 9.3. Multi-Slice Computed Tomography Scans

CT scans will be performed using a high end CT- scanner like dual-source CT-scanner (Somatom Definition Flash, Siemens Medical Solutions, Forchheim, Germany). To assess the AVC scores the following CT settings are used: Gantry rotation time 0.28 s, 3.0 mm collimation, acquisition 128 x 0.6 mm, 120 kV tube voltage, 90 mAs tube current, and a prospectively electrocardiographic (ECG) -triggered scan (gating at 65%-75% of the R-R interval if the heart rate were <75 or at 250-400ms after the QRS-complex if heart rate were >75). Calculation of the AVC scores is performed off-line by summing-up all spots of calcifications in the aortic valve area. AVC is defined as calcification below the ostia of the coronaries in the aortic sinus Valsalva, within the valve leaflet, or in the aortic annulus.<sup>36</sup> The CAC score is assessed as previously described.<sup>32</sup> To assess the calcifications in the carotid, aortic, renal, iliac and femoral arteries a CT scanning proximal from the mandibular bone and distally to the proximal third of the femur are performed with the following settings: Spiral scan with a pitch of 3.2 (Flash), 100 kV tube voltage, 90 mAs, collimation of 128 x 0.6mm, Safire 3 and slice thickness 5 mm. The calcifications scores are measured using the Agatston method.

To examine vessel plaques in the coronaries, an ordinary contrast CT will be performed. CT scanners with a minimum of 64 detector rows will be used. The scanning protocol depends on the local CT scanner and the patient heart rate. In patients with a stable heart rate above 60 beats per minute, orally or intravenously  $\beta$ -blocker are administered until the heart rate is appropriate (if possible below 60), and a prospectively gated protocol is used. In patients with a heart rate  $> 70$  bpm despite  $\beta$ -blocker pretreatment a retrospectively gated scan with dose modulation will be performed. In case of an irregular heart rhythm, a prospectively scan 250-400ms after the QRS-complex is performed. Additionally, sublingual nitrates are administered prior to the scan. 50-80 mL of contrast agent are injected into an antecubital vein at a rate of 6.0 mL/s followed by 60 mL intravenous saline (6.0 mL/s) using a dual-head power injector. Data acquisition parameters depends on the local CT scanner, but slice collimation will be below 0.6mm, gantry rotation time as fast as possible and a tube voltage of 100 or 120 kV depending on patients' weight. The coronary artery tree will be analyzed for the presence and severity of CAD, according to the classification of the American Heart Association 16-segment model. Coronary plaques are defined as visible structures within or adjacent to the coronary artery lumen, which can be clearly distinguished from the vessel lumen and the surrounding pericardial tissue. All coronary segments  $\geq 2$  mm in diameter with plaque will be analyzed using a semi-automated software. Scans are analyzed an experienced cardiologist.

#### 9.4 Echocardiographic measurements

A comprehensive transthoracic echocardiography is performed at baseline and hereafter annually. Left ventricle (LV) volume and ejection fraction (EF) are estimated. LV longitudinal function is assessed using global strain analysis. LV remodelling is assessed by relative wall thickness and LV mass using the Devereaux formula. LV filling pressure is estimated from assessment of mitral inflow and assessment of diastolic motion of the mitral plane using tissue Doppler imaging. Left atrial size is assessed using biplane planimetry, and longitudinal left atrial strain is estimated using 2D speckle tracking. Aortic valve area is estimated by quantitative Doppler ultrasound using the continuity equation. LV outflow tract time-velocity integral is measures with pulsed-wave Doppler by placing the sample volume just below the region of flow convergence. Peak flow velocity across the valve is determined in the window with the highest velocity. AS severity is graded according to current guidelines (*secondary endpoints*).<sup>37</sup>

#### 9.5. Bone mineral-density, -geometry and -microstructure

Using the images obtained from the multi-slice computed tomography the lumbar spine and hip can be evaluated. The currently available software from Mindways® allows for volumetric bone mineral-density of the trabecular compartment in the spine, thus making it possible to calculate T- and Z-scores for volumetric bone mineral density in the spine. At the hip both cortical, trabecular and total hip volumetric bone mineral density can be evaluated for the femoral neck, the trochanter region and femoral shaft. Again both T- and Z-scores can be calculated. The software also offers evaluation of the total bone area at the spine, and hip.

1  
2  
3  
4  
5  
6  
7  
8  
9  
10  
11  
12  
13  
14  
15  
16  
17  
18  
19  
20  
21  
22  
23  
24  
25  
26  
27  
28  
29  
30  
31  
32  
33  
34  
35  
36  
37  
38  
39  
40  
41  
42  
43  
44  
45  
46  
47  
48  
49  
50  
51  
52  
53  
54  
55  
56  
57  
58  
59  
60

## 10. Figure legends

### Figure 1.

Timeline and applied tests, for details please see “Applied tests during the study”.

For peer review only



## 11. Reference List

- (1) Diederichsen AC, Rasmussen LM, Sogaard R et al. The Danish Cardiovascular Screening Trial (DANCAVAS): study protocol for a randomized controlled trial. *Trials* 2015;16:554.
- (2) Iung B, Baron G, Butchart EG et al. A prospective survey of patients with valvular heart disease in Europe: The Euro Heart Survey on Valvular Heart Disease. *Eur Heart J* 2003;24:1231-1243.
- (3) Nkomo VT, Gardin JM, Skelton TN, Gottdiener JS, Scott CG, Enriquez-Sarano M. Burden of valvular heart diseases: a population-based study. *Lancet* 2006;368:1005-1011.
- (4) New SE, Aikawa E. Molecular imaging insights into early inflammatory stages of arterial and aortic valve calcification. *Circ Res* 2011;108:1381-1391.
- (5) Pawade TA, Newby DE, Dweck MR. Calcification in Aortic Stenosis: The Skeleton Key. *J Am Coll Cardiol* 2015;66:561-577.
- (6) Marquis-Gravel G, Redfors B, Leon MB, Genereux P. Medical Treatment of Aortic Stenosis. *Circulation* 2016;134:1766-1784.
- (7) Rennenberg RJ, Schurgers LJ, Kroon AA, Stehouwer CD. Arterial calcifications. *J Cell Mol Med* 2010;14:2203-2210.
- (8) Danziger J, Young RL, Shea MK et al. Vitamin K-Dependent Protein Activity and Incident Ischemic Cardiovascular Disease: The Multi-Ethnic Study of Atherosclerosis. *Arterioscler Thromb Vasc Biol* 2016;36:1037-1042.
- (9) Viegas CS, Rafael MS, Enriquez JL et al. Gla-rich protein acts as a calcification inhibitor in the human cardiovascular system. *Arterioscler Thromb Vasc Biol* 2015;35:399-408.
- (10) Schurgers LJ, Uitto J, Reutelingsperger CP. Vitamin K-dependent carboxylation of matrix Gla-protein: a crucial switch to control ectopic mineralization. *Trends Mol Med* 2013;19:217-226.
- (11) Ronn SH, Harslof T, Pedersen SB, Langdahl BL. Vitamin K2 (menaquinone-7) prevents age-related deterioration of trabecular bone microarchitecture at the tibia in postmenopausal women. *Eur J Endocrinol* 2016;175:541-549.
- (12) Luo G, Ducy P, McKee MD et al. Spontaneous calcification of arteries and cartilage in mice lacking matrix GLA protein. *Nature* 1997;386:78-81.
- (13) Price PA, Faus SA, Williamson MK. Warfarin causes rapid calcification of the elastic lamellae in rat arteries and heart valves. *Arterioscler Thromb Vasc Biol* 1998;18:1400-1407.
- (14) Schurgers LJ, Spronk HM, Soute BA, Schiffers PM, DeMey JG, Vermeer C. Regression of warfarin-induced medial elastocalcinosis by high intake of vitamin K in rats. *Blood* 2007;109:2823-2831.
- (15) McCabe KM, Booth SL, Fu X et al. Dietary vitamin K and therapeutic warfarin alter the susceptibility to vascular calcification in experimental chronic kidney disease. *Kidney Int* 2013;83:835-844.

- 1  
2  
3  
4 (16) Kruger T, Oelenberg S, Kaesler N et al. Warfarin induces cardiovascular damage in mice. *Arterioscler Thromb Vasc Biol* 2013;33:2618-2624.  
5  
6  
7 (17) Rennenberg RJ, van Varik BJ, Schurgers LJ et al. Chronic coumarin treatment is associated with  
8 increased extracoronary arterial calcification in humans. *Blood* 2010;115:5121-5123.  
9  
10 (18) Weijs B, Blaauw Y, Rennenberg RJ et al. Patients using vitamin K antagonists show increased levels  
11 of coronary calcification: an observational study in low-risk atrial fibrillation patients. *Eur Heart J*  
12 2011;32:2555-2562.  
13  
14 (19) Schurgers LJ, Joosen IA, Laufer EM et al. Vitamin K-antagonists accelerate atherosclerotic  
15 calcification and induce a vulnerable plaque phenotype. *PLoS One* 2012;7:e43229.  
16  
17 (20) Chaikriangkrai K, Valderrabano M, Bala SK et al. Prevalence and Implications of Subclinical Coronary  
18 Artery Disease in Patients With Atrial Fibrillation. *Am J Cardiol* 2015;116:1219-1223.  
19  
20 (21) Yamamoto K, Yamamoto H, Takeuchi M et al. Risk Factors for Progression of Degenerative Aortic  
21 Valve Disease in the Japanese- The Japanese Aortic Stenosis Study (JASS) Prospective Analysis. *Circ J*  
22 2015;79:2050-2057.  
23  
24 (22) Schurgers LJ, Teunissen KJ, Knapen MH et al. Novel conformation-specific antibodies against matrix  
25 gamma-carboxyglutamic acid (Gla) protein: undercarboxylated matrix Gla protein as marker for  
26 vascular calcification. *Arterioscler Thromb Vasc Biol* 2005;25:1629-1633.  
27  
28 (23) Geleijnse JM, Vermeer C, Grobbee DE et al. Dietary intake of menaquinone is associated with a  
29 reduced risk of coronary heart disease: the Rotterdam Study. *J Nutr* 2004;134:3100-3105.  
30  
31 (24) Shea MK, O'Donnell CJ, Hoffmann U et al. Vitamin K supplementation and progression of coronary  
32 artery calcium in older men and women. *Am J Clin Nutr* 2009;89:1799-1807.  
33  
34 (25) Braam LA, Hoeks AP, Brouns F, Hamulyak K, Gerichhausen MJ, Vermeer C. Beneficial effects of  
35 vitamins D and K on the elastic properties of the vessel wall in postmenopausal women: a follow-up  
36 study. *Thromb Haemost* 2004;91:373-380.  
37  
38 (26) Knapen MH, Braam LA, Drummen NE, Bekers O, Hoeks AP, Vermeer C. Menaquinone-7  
39 supplementation improves arterial stiffness in healthy postmenopausal women. A double-blind  
40 randomised clinical trial. *Thromb Haemost* 2015;113:1135-1144.  
41  
42 (27) Dalmeijer GW, van der Schouw YT, Magdeleyns E, Ahmed N, Vermeer C, Beulens JW. The effect of  
43 menaquinone-7 supplementation on circulating species of matrix Gla protein. *Atherosclerosis*  
44 2012;225:397-402.  
45  
46 (28) Westenfeld R, Krueger T, Schlieper G et al. Effect of vitamin K2 supplementation on functional  
47 vitamin K deficiency in hemodialysis patients: a randomized trial. *Am J Kidney Dis* 2012;59:186-195.  
48  
49 (29) Caluwe R, Vandecasteele S, Van VB, Vermeer C, De Vriese AS. Vitamin K2 supplementation in  
50 haemodialysis patients: a randomized dose-finding study. *Nephrol Dial Transplant* 2014;29:1385-  
51 1390.  
52  
53  
54  
55  
56  
57  
58



- 1  
2  
3  
4 (30) Theuwissen E, Cranenburg EC, Knapen MH et al. Low-dose menaquinone-7 supplementation  
5 improved extra-hepatic vitamin K status, but had no effect on thrombin generation in healthy  
6 subjects. *Br J Nutr* 2012;108:1652-1657.  
7
- 8 (31) Pucaj K, Rasmussen H, Moller M, Preston T. Safety and toxicological evaluation of a synthetic  
9 vitamin K2, menaquinone-7. *Toxicol Mech Methods* 2011;21:520-532.  
10
- 11 (32) Paulsen NH, Carlsen BB, Dahl JS et al. Association between aortic valve calcification measured on  
12 non-contrast computed tomography and aortic valve stenosis in the general population. *J*  
13 *Cardiovasc Comput Tomogr* 2016;10:309-315.  
14
- 15 (33) Caluwe R, Pyfferoen L, De BK, De Vriese AS. The effects of vitamin K supplementation and vitamin K  
16 antagonists on progression of vascular calcification: ongoing randomized controlled trials. *Clin*  
17 *Kidney J* 2016;9:273-279.  
18
- 19 (34) Preston DL, Ron E, Tokuoka S et al. Solid cancer incidence in atomic bomb survivors: 1958-1998.  
20 *Radiat Res* 2007;168:1-64.  
21
- 22 (35) Einstein AJ, Knuuti J. Cardiac imaging: does radiation matter? *Eur Heart J* 2012;33:573-578.  
23
- 24 (36) Kvist TV, Lindholt JS, Rasmussen LM et al. The DanCavas Pilot Study of Multifaceted Screening for  
25 Subclinical Cardiovascular Disease in Men and Women Aged 65-74 Years. *Eur J Vasc Endovasc Surg*  
26 2017;53:123-131.  
27
- 28 (37) Baumgartner H, Hung J, Bermejo J et al. Echocardiographic assessment of valve stenosis: EAE/ASE  
29 recommendations for clinical practice. *J Am Soc Echocardiogr* 2009;22:1-23.  
30  
31  
32  
33  
34  
35  
36  
37  
38  
39  
40  
41  
42  
43  
44  
45  
46  
47  
48  
49  
50  
51  
52  
53  
54  
55  
56  
57  
58  
59  
60

## 12. Footnotes

### 12.1. Contributors

AD, JL, NEF and LMR conceived and designed the study. AD wrote the study protocol and is the principal investigator while JL, NEF and LMR are coinvestigators. MF is the clinical research fellow responsible for the running of the clinical trial. Kristian Øvrehus is responsible for the Cardiac-CT contrast protocol. JD and Jacob E Møller are responsible for the echocardiography protocol. Grazina Urbonaviciene (Silkeborg), Søren Warberg Becker (Silkeborg), Jess Lambrechtsen (Svendborg), Søren Auscher (Svendborg), Susanne Hosbond (Vejle) and Dilek Hunerel Alan (Vejle), are site specific coinvestigators. LF is involved in the bone-related substudy. Oke Gerke is responsible for statistics. HM is representative for the DSMB. All authors have contributed to the revision of the manuscript.

### 12.2. Funding statement

The trial is supported by the Danish Heart Foundation [grant number 17-R116-A7569-22071], Region of Southern Denmark's Research council [grant number 17/15638] and the Novo Nordisk Foundation [grant number NNF17OC0029076].

The study-tablets, including placebo, are provided for free of charge by Kappa Bioscience A/S, Silurveien 2B, 0380 Oslo and Orkla Care, Industrigrenen 10, 2635 Ishøj. The companies are not involved in the execution of the study or analysis of the data.

### 12.3. Competing interests statement

None declared.

### 12.4. Ethics approval

The protocol is approved by the Regional Scientific Ethical Committee for Southern Denmark.

### 12.5. Data sharing statement:

Positive as well as negative findings will be reported via conference presentations and peer-reviewed publications. All the data will be available upon request.

| Month                    | 0 | 3 | 6 | 9 | 12 | 15 | 18 | 21 | 24 | (27) | (30) |
|--------------------------|---|---|---|---|----|----|----|----|----|------|------|
| Informed consent         | X |   |   |   |    |    |    |    |    |      |      |
| Medical interview        | X |   | X |   | X  |    | X  |    | X  |      | (X)  |
| Web-based survey         |   | X |   | X |    | X  |    | X  |    | (X)  |      |
| Biochemical measurements | X |   | X |   | X  |    | X  |    | X  |      | (X)  |
| Non-contrast CT          | X |   |   |   | X  |    |    |    | X  |      | (X)  |
| Contrast CT              | X |   |   |   |    |    |    |    | X  |      |      |
| Echocardiography         | X |   |   |   | X  |    |    |    | X  |      | (X)  |

Timeline and applied tests, for details please see "Applied tests during the study".

154x75mm (300 x 300 DPI)

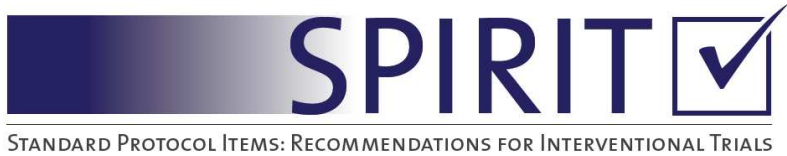

1  
2  
3  
4  
5  
6  
7  
8  
9  
10  
11  
12  
13  
14  
15  
16  
17  
18  
19  
20  
21  
22  
23  
24  
25  
26  
27  
28  
29  
30  
31  
32  
33  
34  
35  
36  
37  
38  
39  
40  
41  
42  
43  
44  
45  
46  
47

SPIRIT 2013 Checklist: Recommended items to address in a clinical trial protocol and related documents\*

| Section/item                      | Item No | Description                                                                                                                                                                                                                                                                              | Addressed on page number |
|-----------------------------------|---------|------------------------------------------------------------------------------------------------------------------------------------------------------------------------------------------------------------------------------------------------------------------------------------------|--------------------------|
| <b>Administrative information</b> |         |                                                                                                                                                                                                                                                                                          |                          |
| Title                             | 1       | Descriptive title identifying the study design, population, interventions, and, if applicable, trial acronym                                                                                                                                                                             | _____1_____              |
| Trial registration                | 2a      | Trial identifier and registry name. If not yet registered, name of intended registry                                                                                                                                                                                                     | _____2_____              |
|                                   | 2b      | All items from the World Health Organization Trial Registration Data Set                                                                                                                                                                                                                 | _____                    |
| Protocol version                  | 3       | Date and version identifier                                                                                                                                                                                                                                                              | _____1_____              |
| Funding                           | 4       | Sources and types of financial, material, and other support                                                                                                                                                                                                                              | _____15_____             |
| Roles and responsibilities        | 5a      | Names, affiliations, and roles of protocol contributors                                                                                                                                                                                                                                  | _____15_____             |
|                                   | 5b      | Name and contact information for the trial sponsor                                                                                                                                                                                                                                       | _____15_____             |
|                                   | 5c      | Role of study sponsor and funders, if any, in study design; collection, management, analysis, and interpretation of data; writing of the report; and the decision to submit the report for publication, including whether they will have ultimate authority over any of these activities | _____15_____             |
|                                   | 5d      | Composition, roles, and responsibilities of the coordinating centre, steering committee, endpoint adjudication committee, data management team, and other individuals or groups overseeing the trial, if applicable (see Item 21a for data monitoring committee)                         | _____7, 8, _____         |

## Introduction

|                          |    |                                                                                                                                                                                                           |     |
|--------------------------|----|-----------------------------------------------------------------------------------------------------------------------------------------------------------------------------------------------------------|-----|
| Background and rationale | 6a | Description of research question and justification for undertaking the trial, including summary of relevant studies (published and unpublished) examining benefits and harms for each intervention        | 4,5 |
|                          | 6b | Explanation for choice of comparators                                                                                                                                                                     |     |
| Objectives               | 7  | Specific objectives or hypotheses                                                                                                                                                                         | 5   |
| Trial design             | 8  | Description of trial design including type of trial (eg, parallel group, crossover, factorial, single group), allocation ratio, and framework (eg, superiority, equivalence, noninferiority, exploratory) | 5   |

## Methods: Participants, interventions, and outcomes

|                      |     |                                                                                                                                                                                                                                                                                                                                                                                |     |
|----------------------|-----|--------------------------------------------------------------------------------------------------------------------------------------------------------------------------------------------------------------------------------------------------------------------------------------------------------------------------------------------------------------------------------|-----|
| Study setting        | 9   | Description of study settings (eg, community clinic, academic hospital) and list of countries where data will be collected. Reference to where list of study sites can be obtained                                                                                                                                                                                             | 5   |
| Eligibility criteria | 10  | Inclusion and exclusion criteria for participants. If applicable, eligibility criteria for study centres and individuals who will perform the interventions (eg, surgeons, psychotherapists)                                                                                                                                                                                   | 5   |
| Interventions        | 11a | Interventions for each group with sufficient detail to allow replication, including how and when they will be administered                                                                                                                                                                                                                                                     | 5,6 |
|                      | 11b | Criteria for discontinuing or modifying allocated interventions for a given trial participant (eg, drug dose change in response to harms, participant request, or improving/worsening disease)                                                                                                                                                                                 | 6   |
|                      | 11c | Strategies to improve adherence to intervention protocols, and any procedures for monitoring adherence (eg, drug tablet return, laboratory tests)                                                                                                                                                                                                                              | 6   |
|                      | 11d | Relevant concomitant care and interventions that are permitted or prohibited during the trial                                                                                                                                                                                                                                                                                  |     |
| Outcomes             | 12  | Primary, secondary, and other outcomes, including the specific measurement variable (eg, systolic blood pressure), analysis metric (eg, change from baseline, final value, time to event), method of aggregation (eg, median, proportion), and time point for each outcome. Explanation of the clinical relevance of chosen efficacy and harm outcomes is strongly recommended | 6   |
| Participant timeline | 13  | Time schedule of enrolment, interventions (including any run-ins and washouts), assessments, and visits for participants. A schematic diagram is highly recommended (see Figure)                                                                                                                                                                                               | 6   |

1  
2  
3 Sample size 14 Estimated number of participants needed to achieve study objectives and how it was determined, including 7  
4 clinical and statistical assumptions supporting any sample size calculations

5  
6 Recruitment 15 Strategies for achieving adequate participant enrolment to reach target sample size 8  
7

8 **Methods: Assignment of interventions (for controlled trials)**  
9

10 Allocation:

11 Sequence generation 16a Method of generating the allocation sequence (eg, computer-generated random numbers), and list of any 7  
12 factors for stratification. To reduce predictability of a random sequence, details of any planned restriction  
13 (eg, blocking) should be provided in a separate document that is unavailable to those who enrol participants  
14 or assign interventions  
15

16  
17 Allocation concealment mechanism 16b Mechanism of implementing the allocation sequence (eg, central telephone; sequentially numbered, 7  
18 opaque, sealed envelopes), describing any steps to conceal the sequence until interventions are assigned  
19  
20

21 Implementation 16c Who will generate the allocation sequence, who will enrol participants, and who will assign participants to 7  
22 interventions  
23

24 Blinding (masking) 17a Who will be blinded after assignment to interventions (eg, trial participants, care providers, outcome 7  
25 assessors, data analysts), and how  
26

27 17b If blinded, circumstances under which unblinding is permissible, and procedure for revealing a participant's 7  
28 allocated intervention during the trial  
29  
30

31 **Methods: Data collection, management, and analysis**  
32

33 Data collection methods 18a Plans for assessment and collection of outcome, baseline, and other trial data, including any related 7,8  
34 processes to promote data quality (eg, duplicate measurements, training of assessors) and a description of  
35 study instruments (eg, questionnaires, laboratory tests) along with their reliability and validity, if known.  
36 Reference to where data collection forms can be found, if not in the protocol  
37

38 18b Plans to promote participant retention and complete follow-up, including list of any outcome data to be 7,8  
39 collected for participants who discontinue or deviate from intervention protocols  
40  
41  
42  
43  
44

|    |                                 |     |                                                                                                                                                                                                                                                                                                                                       |               |
|----|---------------------------------|-----|---------------------------------------------------------------------------------------------------------------------------------------------------------------------------------------------------------------------------------------------------------------------------------------------------------------------------------------|---------------|
| 1  |                                 |     |                                                                                                                                                                                                                                                                                                                                       |               |
| 2  |                                 |     |                                                                                                                                                                                                                                                                                                                                       |               |
| 3  | Data management                 | 19  | Plans for data entry, coding, security, and storage, including any related processes to promote data quality (eg, double data entry; range checks for data values). Reference to where details of data management procedures can be found, if not in the protocol                                                                     | ___8___       |
| 4  |                                 |     |                                                                                                                                                                                                                                                                                                                                       |               |
| 5  |                                 |     |                                                                                                                                                                                                                                                                                                                                       |               |
| 6  |                                 |     |                                                                                                                                                                                                                                                                                                                                       |               |
| 7  | Statistical methods             | 20a | Statistical methods for analysing primary and secondary outcomes. Reference to where other details of the statistical analysis plan can be found, if not in the protocol                                                                                                                                                              | ___7___       |
| 8  |                                 |     |                                                                                                                                                                                                                                                                                                                                       |               |
| 9  |                                 |     |                                                                                                                                                                                                                                                                                                                                       |               |
| 10 |                                 | 20b | Methods for any additional analyses (eg, subgroup and adjusted analyses)                                                                                                                                                                                                                                                              | ___7___       |
| 11 |                                 |     |                                                                                                                                                                                                                                                                                                                                       |               |
| 12 |                                 | 20c | Definition of analysis population relating to protocol non-adherence (eg, as randomised analysis), and any statistical methods to handle missing data (eg, multiple imputation)                                                                                                                                                       | ___7___       |
| 13 |                                 |     |                                                                                                                                                                                                                                                                                                                                       |               |
| 14 |                                 |     |                                                                                                                                                                                                                                                                                                                                       |               |
| 15 | <b>Methods: Monitoring</b>      |     |                                                                                                                                                                                                                                                                                                                                       |               |
| 16 |                                 |     |                                                                                                                                                                                                                                                                                                                                       |               |
| 17 | Data monitoring                 | 21a | Composition of data monitoring committee (DMC); summary of its role and reporting structure; statement of whether it is independent from the sponsor and competing interests; and reference to where further details about its charter can be found, if not in the protocol. Alternatively, an explanation of why a DMC is not needed | ___8, 9___    |
| 18 |                                 |     |                                                                                                                                                                                                                                                                                                                                       |               |
| 19 |                                 |     |                                                                                                                                                                                                                                                                                                                                       |               |
| 20 |                                 |     |                                                                                                                                                                                                                                                                                                                                       |               |
| 21 |                                 |     |                                                                                                                                                                                                                                                                                                                                       |               |
| 22 |                                 | 21b | Description of any interim analyses and stopping guidelines, including who will have access to these interim results and make the final decision to terminate the trial                                                                                                                                                               | ___7,9___     |
| 23 |                                 |     |                                                                                                                                                                                                                                                                                                                                       |               |
| 24 |                                 |     |                                                                                                                                                                                                                                                                                                                                       |               |
| 25 | Harms                           | 22  | Plans for collecting, assessing, reporting, and managing solicited and spontaneously reported adverse events and other unintended effects of trial interventions or trial conduct                                                                                                                                                     | ___6, 8, 9___ |
| 26 |                                 |     |                                                                                                                                                                                                                                                                                                                                       |               |
| 27 |                                 |     |                                                                                                                                                                                                                                                                                                                                       |               |
| 28 | Auditing                        | 23  | Frequency and procedures for auditing trial conduct, if any, and whether the process will be independent from investigators and the sponsor                                                                                                                                                                                           | _____         |
| 29 |                                 |     |                                                                                                                                                                                                                                                                                                                                       |               |
| 30 |                                 |     |                                                                                                                                                                                                                                                                                                                                       |               |
| 31 |                                 |     |                                                                                                                                                                                                                                                                                                                                       |               |
| 32 | <b>Ethics and dissemination</b> |     |                                                                                                                                                                                                                                                                                                                                       |               |
| 33 |                                 |     |                                                                                                                                                                                                                                                                                                                                       |               |
| 34 | Research ethics approval        | 24  | Plans for seeking research ethics committee/institutional review board (REC/IRB) approval                                                                                                                                                                                                                                             | ___9___       |
| 35 |                                 |     |                                                                                                                                                                                                                                                                                                                                       |               |
| 36 |                                 |     |                                                                                                                                                                                                                                                                                                                                       |               |
| 37 | Protocol amendments             | 25  | Plans for communicating important protocol modifications (eg, changes to eligibility criteria, outcomes, analyses) to relevant parties (eg, investigators, REC/IRBs, trial participants, trial registries, journals, regulators)                                                                                                      | _____         |
| 38 |                                 |     |                                                                                                                                                                                                                                                                                                                                       |               |
| 39 |                                 |     |                                                                                                                                                                                                                                                                                                                                       |               |
| 40 |                                 |     |                                                                                                                                                                                                                                                                                                                                       |               |
| 41 |                                 |     |                                                                                                                                                                                                                                                                                                                                       |               |
| 42 |                                 |     |                                                                                                                                                                                                                                                                                                                                       |               |
| 43 |                                 |     |                                                                                                                                                                                                                                                                                                                                       |               |
| 44 |                                 |     |                                                                                                                                                                                                                                                                                                                                       |               |
| 45 |                                 |     |                                                                                                                                                                                                                                                                                                                                       |               |
| 46 |                                 |     |                                                                                                                                                                                                                                                                                                                                       |               |
| 47 |                                 |     |                                                                                                                                                                                                                                                                                                                                       |               |



1  
2  
3  
4  
5  
6  
7  
8  
9  
10  
11  
12  
13  
14  
15  
16  
17  
18  
19  
20  
21  
22  
23  
24  
25  
26  
27  
28  
29  
30  
31  
32  
33  
34  
35  
36  
37  
38  
39  
40  
41  
42  
43  
44  
45  
46  
47

|                               |     |                                                                                                                                                                                                                                                                                     |     |
|-------------------------------|-----|-------------------------------------------------------------------------------------------------------------------------------------------------------------------------------------------------------------------------------------------------------------------------------------|-----|
| Consent or assent             | 26a | Who will obtain informed consent or assent from potential trial participants or authorised surrogates, and how (see Item 32)                                                                                                                                                        | 7,8 |
|                               | 26b | Additional consent provisions for collection and use of participant data and biological specimens in ancillary studies, if applicable                                                                                                                                               |     |
| Confidentiality               | 27  | How personal information about potential and enrolled participants will be collected, shared, and maintained in order to protect confidentiality before, during, and after the trial                                                                                                |     |
| Declaration of interests      | 28  | Financial and other competing interests for principal investigators for the overall trial and each study site                                                                                                                                                                       | 15  |
| Access to data                | 29  | Statement of who will have access to the final trial dataset, and disclosure of contractual agreements that limit such access for investigators                                                                                                                                     | 8   |
| Ancillary and post-trial care | 30  | Provisions, if any, for ancillary and post-trial care, and for compensation to those who suffer harm from trial participation                                                                                                                                                       |     |
| Dissemination policy          | 31a | Plans for investigators and sponsor to communicate trial results to participants, healthcare professionals, the public, and other relevant groups (eg, via publication, reporting in results databases, or other data sharing arrangements), including any publication restrictions | 8   |
|                               | 31b | Authorship eligibility guidelines and any intended use of professional writers                                                                                                                                                                                                      | 8   |
|                               | 31c | Plans, if any, for granting public access to the full protocol, participant-level dataset, and statistical code                                                                                                                                                                     |     |
| <b>Appendices</b>             |     |                                                                                                                                                                                                                                                                                     |     |
| Informed consent materials    | 32  | Model consent form and other related documentation given to participants and authorised surrogates                                                                                                                                                                                  |     |
| Biological specimens          | 33  | Plans for collection, laboratory evaluation, and storage of biological specimens for genetic or molecular analysis in the current trial and for future use in ancillary studies, if applicable                                                                                      | 10  |

---

\*It is strongly recommended that this checklist be read in conjunction with the SPIRIT 2013 Explanation & Elaboration for important clarification on the items. Amendments to the protocol should be tracked and dated. The SPIRIT checklist is copyrighted by the SPIRIT Group under the Creative Commons "[Attribution-NonCommercial-NoDerivs 3.0 Unported](https://creativecommons.org/licenses/by-nc-nd/3.0/)" license.
